# Supplementary material for: The Methodological Trends of Traditional Herbal Medicine Employing Network Pharmacology
Source: PubMed Central journal article supplement (PMC6723118; doi:10.3390/biom9080362), 2019-08-13
Supplement: biomolecules-09-00362-s001.pdf [file biomolecules-09-00362-s001.pdf]

## Supplementary Documents

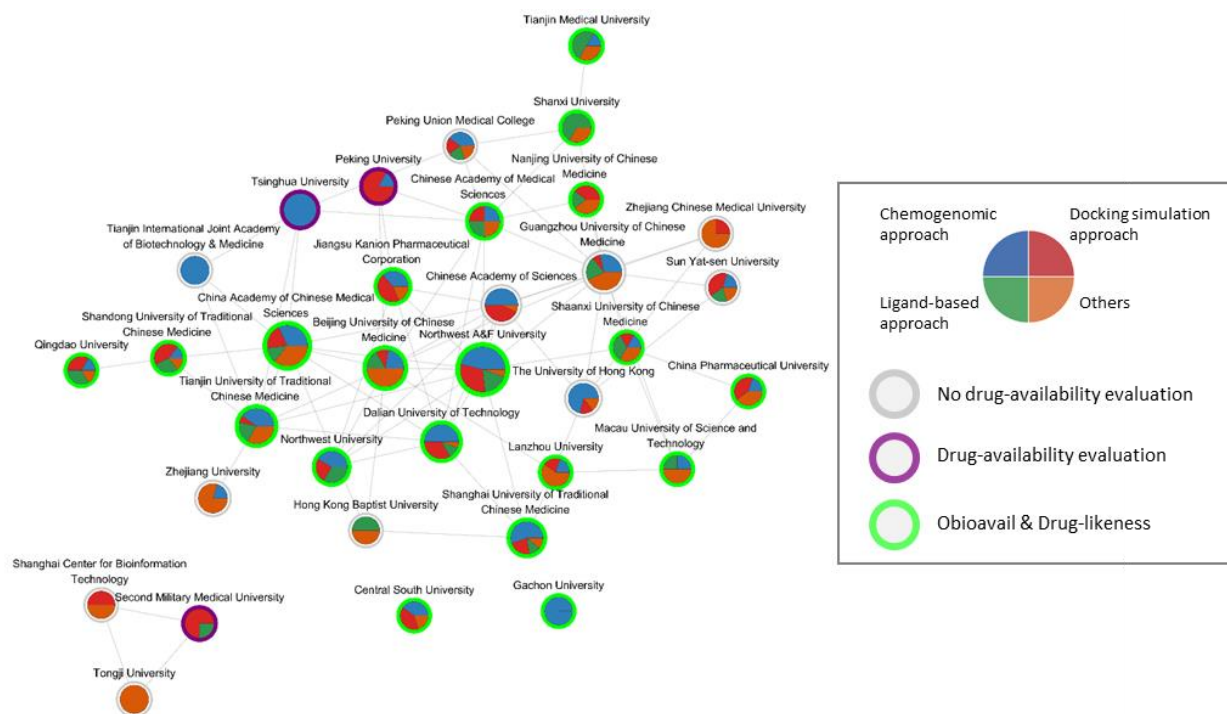

Supplementary Figure S1. The affiliation network of THM-NP studies. Circles represent the affiliations. The size of the circles and squares reflect the number of occurrences in the THM-NP studies. Nodes that appeared fewer than 3 times were removed. The box to the right of the network represents the index for the pie chart and the outline of the circle.

Supplementary Table 1. Selected THM-NP studies.

| Title                                                                                                                                                                 | Year | Author                                                                                                                                           | Affiliation                                                                                    | The Methods for Constructing H-C Network                                     | The Methods for Constructing C-T Network | The Methods for Target Network Interpretation | References |
|-----------------------------------------------------------------------------------------------------------------------------------------------------------------------|------|--------------------------------------------------------------------------------------------------------------------------------------------------|------------------------------------------------------------------------------------------------|------------------------------------------------------------------------------|------------------------------------------|-----------------------------------------------|------------|
| Drug-target network and polypharmacology studies of a Traditional Chinese Medicine for type II diabetes mellitus                                                      | 2011 | Jiangyong Gu, Hu Zhang, Lirong Chen, Shun Xu, Gu Yuan, Xiaojie Xu                                                                                | Peking University, Zhengzhou University                                                        | Beilstein database, Chinese herbal drug database                             | Molecular docking                        | .                                             | [1]        |
| Potential synergistic and multitarget effect of herbal pair Chuanxiong Rhizome-Paeonia Albifora Pall on osteoarthritis disease: a computational pharmacology approach | 2011 | Hongzhi Ye, Chunsong Zheng, Xiaojie Xu, Mingxia Wu, Xianxiang Liu                                                                                | Fujian University of Traditional Chinese Medicine, Peking University                           | Beilstein database, Chinese herbal drug database, Literature mining          | Molecular docking                        | .                                             | [2]        |
| A System-Level Investigation into the Mechanisms of Chinese Traditional Medicine; Compound Danshen Formula for Cardiovascular Disease Treatment                       | 2012 | Xiuxiu Li, Xue Xu, Jinan Wang, Hua Yu, Xia Wang, Hongjun Yang, Haiyu Xu, Shihuan Tang, Yan Li, Ling Yang, Luqi Huang, Yonghua Wang, Shengli Yang | Chinese Academy of Medical Sciences, Northwest A&F University, Dalian University of Technology | Chinese Academy of Sciences Chemistry database, Chinese Herbal Drug Database | PharmMapper, Molecular docking           | TTD, PharmGkb, Drugbank                       | [3]        |
| A Systems Biology Approach to Understanding the Mechanisms of Action of Chinese Herbs for Treatment of                                                                | 2012 | Bohui Li, Xue Xu, Xia Wang, Hua Yu, Xiuxiu Li, Weiyang Tao, Yonghua Wang, Ling Yang                                                              | Northwest A&F University, Chinese Academy Sciences                                             | TCMSP                                                                        | TCMSP, Molecular docking                 | KEGG                                          | [4]        |

| Cardiovascular Disease                                                                                                                                                            |      |                                                                                               |                                                                                                                                                                |            |                   |               |     |
|-----------------------------------------------------------------------------------------------------------------------------------------------------------------------------------|------|-----------------------------------------------------------------------------------------------|----------------------------------------------------------------------------------------------------------------------------------------------------------------|------------|-------------------|---------------|-----|
| A systems biology approach to uncovering pharmacological synergy in herbal medicines with applications to cardiovascular disease.                                                 | 2012 | Xia Wang, Xue Xu, Weiyang Tao, Yan Li, Yonghua Wang, Ling Yang                                | Northwest A&F University, Dalian University of Technology, Chinese Academy of Sciences, China Academy of Chinese Medical Sciences, Chinese Academy of Sciences | TCMSP      | TCMSP             | PharmGkb, TTD | [5] |
| Pathway-pathway network-based study of the therapeutic mechanisms by which salvianolic acid B regulates cardiovascular diseases                                                   | 2012 | Li Ye, Yuan He, Hao Ye, Xueping Liu, Linlin Yang, Zhiwei Cao, Kailin Tang                     | Shanghai Center for Bioinformation Technology, Tongji University                                                                                               |            | Molecular docking |               | [6] |
| Therapeutic effects of astragaloside IV on myocardial injuries: multi-target identification and network analysis                                                                  | 2012 | Jing Zhao, Pengyuan Yang, Fan Li, Lin Tao, Hong Ding, Yaocheng Rui, Zhiwei Cao, Weidong Zhang | Second Military Medical University, Shanghai Center for Bioinformation Technology, Tongji University, Logistical Engineering University                        |            | Molecular docking |               | [7] |
| Understanding the molecular mechanism of interventions in treating rheumatoid arthritis patients with corresponding traditional chinese medicine patterns based on bioinformatics | 2012 | Miao Jiang, Cheng Lu, Gao Chen, Cheng Xiao, Qinglin Zha, Xuyan Niu, Shilin Chen, Aiping Lu    | China Academy of Chinese Medical Sciences, Hubei University, China-Japan Friendship Hospital, Jiangxi University of Chinese Medicine, Hong Kong                | TCMGeneDIT | TCMGeneDIT        | Gene ontology | [8] |

|                                                                                                                                                                          |      |                                                                                                                                        |                                                                                                                                                             |                                                                                                 |                          |               |      |
|--------------------------------------------------------------------------------------------------------------------------------------------------------------------------|------|----------------------------------------------------------------------------------------------------------------------------------------|-------------------------------------------------------------------------------------------------------------------------------------------------------------|-------------------------------------------------------------------------------------------------|--------------------------|---------------|------|
| approach                                                                                                                                                                 |      |                                                                                                                                        | Baptist University                                                                                                                                          |                                                                                                 |                          |               |      |
| Deciphering the combination principles of Traditional Chinese Medicine from a systems pharmacology perspective based on Ma-huang Decoction                               | 2013 | Yao Yao, Xiaodong Zhang, Zhenzhong Wang, Chunli Zheng, Peng Li, Chao Huang, Weiyang Tao, Wei Xiao, Yonghua Wang, Luqi Huang, Ling Yang | Northwest A&F University, Zhejiang Jinju Chemical Corporation, Jiangsu Kanion Pharmaceutical Corporation, Chinese Academy of Sciences, Northwest University | TCMSP                                                                                           | TCMSP, Molecular docking | TTD           | [9]  |
| Network pharmacology-based prediction of the active ingredients and potential targets of Chinese herbal Radix Curcumae formula for application to cardiovascular disease | 2013 | Weiyang Tao, Xue Xu, Xia Wang, Bohui Li, Yonghua Wang, Yan Li, Ling Yang                                                               | Northwest A&F University, Dalian University of Technology, Chinese Academy of Sciences                                                                      | Chinese Academy of Sciences Chemistry database, Chinese Herbal Drug Database, Literature mining | TCMSP, Molecular docking | TTD, PharmGkb | [10] |
| Systems approaches and polypharmacology for drug discovery from herbal medicines: An example using licorice                                                              | 2013 | Hui Liu, Jinan Wang, Wei Zhou, Yonghua Wang, Ling Yang                                                                                 | Chinese Academy of Sciences, Northwest A&F University                                                                                                       | TCMSP                                                                                           | TCMSP, Molecular docking | TTD, PharmGkb | [11] |
| Systems pharmacology uncovers Janus functions of botanical drugs; activation of host defense system and inhibition of influenza virus replication.                       | 2013 | Xia Wang, Xue Xu, Yan Li, Xiuxiu Li, Weiyang Tao, Bohui Li, Yonghua Wang, Ling Yang                                                    | Chinese Academy of Sciences, Northwest A&F University                                                                                                       | TCMSP                                                                                           | TCMSP, Molecular docking | TTD, KEGG     | [12] |

|                                                                                                                                                            |      |                                                                                                 |                                                                                      |                                                                                     |                                  |                |      |
|------------------------------------------------------------------------------------------------------------------------------------------------------------|------|-------------------------------------------------------------------------------------------------|--------------------------------------------------------------------------------------|-------------------------------------------------------------------------------------|----------------------------------|----------------|------|
| Material basis of Chinese herbal formulas explored by combining pharmacokinetics with network pharmacology                                                 | 2013 | Lixia Pei, Yuanwu Bao, Sheng Liu, Jin Zheng, Xiuping Chen                                       | Shanghai University of Traditional Chinese Medicine, University of Macau             | HPLC                                                                                | NCBI's entrez gene, Pubmed, CNKI |                | [13] |
| A network pharmacology approach to evaluating the efficacy of chinese medicine using genome-wide transcriptional expression data                           | 2013 | Leihong Wu, Yi Wang, Jing Nie, Xiaohui Fan, Yiyu Cheng                                          | Zhejiang University, Chiatai Qingchunbao Pharmaceutical Corporation                  | HPLC                                                                                | Microarray                       | KEGG           | [14] |
| A Systems Biology-Based Investigation into the Pharmacological Mechanisms of Wu Tou Tang Acting on Rheumatoid Arthritis by Integrating Network Analysis    | 2013 | Yanqiong Zhang, Danhua Wang, Shufang Tan, Haiyu Xu, Chunfang Liu, And Na Lin                    | China Academy of Chinese Medical Sciences                                            | TCM Database@taiwan                                                                 | TTD, Molecular docking           | Drugbank, KEGG | [15] |
| An Integrative Platform of TCM Network Pharmacology and Its Application on a Herbal Formula, Qing-Luo-Yin                                                  | 2013 | Bo Zhang, Xu Wang, Shao Li                                                                      | Tianjin International Joint Academy of Biotechnology & Medicine, Tsinghua University | HerBiomap, Literature mining                                                        | drugCIPHER                       | Gene ontology  | [16] |
| Network pharmacology-based prediction of the multi-target capabilities of the compounds in Taohong Siwu decoction, and their application in osteoarthritis | 2013 | Chun-Song Zheng, Xiao-Jie Xu, Hong-Zhi Ye, Guang-Wen Wu, Xi-Hai Li, Hui-Feng Xu, Xian-Xiang Liu | Fujian University of Traditional Chinese Medicine, Peking University                 | Chinese Herbal Drug Database, Handbook of the Chemical Constituents in Chinese Herb | Molecular docking                | TTD            | [17] |

|                                                                                                                                                  |      | Original Plants                                                                                                                      |                                                                                                                                                |                                                                                                         |                                                        |               |      |
|--------------------------------------------------------------------------------------------------------------------------------------------------|------|--------------------------------------------------------------------------------------------------------------------------------------|------------------------------------------------------------------------------------------------------------------------------------------------|---------------------------------------------------------------------------------------------------------|--------------------------------------------------------|---------------|------|
| Pathway Pattern-based prediction of active drug components and gene targets from H1N1 influenza's treatment with maxingshigan-yinqiaosan formula | 2013 | Wen Dai, Jianxin Chen, Peng Lu, Yibo Gao, Lin Chen, Xi Liu, Jianglong Song, Haiyu Xu, Di Chen, Yiping Yang, Hongjun Yang, Luqi Huang | Chinese Academy of Sciences, Beijing University of Chinese Medicine, China Academy of Chinese Medical Sciences                                 | Literature mining                                                                                       | Comparative Toxicogenomics Database, Molecular docking | KEGG          | [18] |
| The multi-target capabilities of the compounds in a TCM used to treat sepsis and their in silico pharmacology.                                   | 2013 | Shitang Ma, Chengtao Feng, Xiaolin Zhang, Guoliang Dai, Changyin Li, Xiaogui Cheng, Peixun Liu, Wenzheng Ju, Hao Yu                  | Nanjing University of Chinese Medicine, Anhui Science and Technology University, Huainan Union University, Chinese Academy of Medical Sciences | Chinese Academy of Sciences of Chemistry database, Dr. Duke's phytochemical and ethnobotanical database | Molecular docking                                      | RCSB PDB      | [19] |
| Towards a bioinformatics analysis of anti-Alzheimer's herbal medicines from a target network perspective                                         | 2013 | Yi Sun, Ruixin Zhu, Hao Ye, Kailin Tang, Jing Zhao, Yujia Chen, Qi Liu, Zhiwei Cao                                                   | Tongji University, Shanghai Center for Bioinformation Technology                                                                               | TCM-ID, Pharmacopoeia of the People's Republic of China, pubmed                                         | HIT                                                    | HIT, KEGG     | [20] |
| Investigation into the mechanism of <i>Eucommia ulmoides</i> Oliv. based on a systems pharmacology approach                                      | 2014 | Yan Li, Chunxiao Han, Jinghui Wang, Wei Xiao, Zhenzhong Wang, Jingxiao Zhang, Yinfeng Yang, Shuwei Zhang, Chunzhi Ai                 | Dalian University of Technology, Jiangsu Kanion Pharmaceutical Corporation, Graduate School of the Chinese Academy of Sciences                 | TCMSP                                                                                                   | TCMSP, Molecular docking                               | TTD           | [21] |
| Systems pharmacology-based approach for                                                                                                          | 2014 | Bohui Li, Weiyang Tao, Chunli Zheng, Piar                                                                                            | Northwest A&F University                                                                                                                       | TCMSP                                                                                                   | TCMSP, Molecular                                       | TTD, PharmGkb | [22] |

|                                                                                                                                                                                                                               |      |                                                                                                                                                                       |                                                                                                                                                                                                                        |                                               |                   |                     |      |
|-------------------------------------------------------------------------------------------------------------------------------------------------------------------------------------------------------------------------------|------|-----------------------------------------------------------------------------------------------------------------------------------------------------------------------|------------------------------------------------------------------------------------------------------------------------------------------------------------------------------------------------------------------------|-----------------------------------------------|-------------------|---------------------|------|
| dissecting the addition and subtraction theory of traditional Chinese medicine: An example using Xiao-Chaihu-Decoction and Da-Chaihu-Decoction                                                                                |      | Sharali, Chao Huang, Yingxue Fu, Yonghua Wang                                                                                                                         |                                                                                                                                                                                                                        |                                               | docking           |                     |      |
| A network pharmacology approach to understanding the mechanisms of action of traditional medicine: Bushenhuoxue formula for treatment of chronic kidney disease                                                               | 2014 | Shaohua Shi, Yuepiao Cai, Xiaojun Cai, Xiaoyong Zheng, Dongsheng Cao, Faqing Ye, Zheng Xiang                                                                          | Central South University, Wenzhou Medical University                                                                                                                                                                   | Comprehensive natural products in TCM, Reaxys | Molecular docking | Drugbank, KEGG      | [23] |
| A novel network pharmacology approach to analyse traditional herbal formulae; the Liu-Wei-Di-Huang pill as a case study                                                                                                       | 2014 | Xujun Liang, Huiying Li, Shao Li                                                                                                                                      | Tsinghua University                                                                                                                                                                                                    | HerBiomap, TCM Database@taiwan                | drugCIPHER        | Gene ontology, KEGG | [24] |
| A systems biology-based approach to uncovering the molecular mechanisms underlying the effects of dragon's blood tablet in colitis, involving the integration of chemical analysis, ADME prediction, and network pharmacology | 2014 | Haiyu Xu, Yanqiong Zhang, Yun Lei, Xiumei Gao, Huaqiang Zhai, Na Lin, Shihuan Tang, Rixin Liang, Yan Ma, Defeng Li, Yi Zhang, Guangrong Zhu, Hongjun Yang, Luqi Huang | Institute of Chinese Materia Medica, China Academy of Chinese Medical Sciences, Beijing University of Chinese Medicine, Tianjin University of Traditional Chinese Medicine, Yunnan Datang Hanfang Pharmacy Corporation | TCM Database@taiwan                           | TTD               | KEGG, Drugbank      | [25] |

|                                                                                                                                                        |      |                                                                                                                   |                                                                                                                                                                 |                                              |                      |               |           |      |
|--------------------------------------------------------------------------------------------------------------------------------------------------------|------|-------------------------------------------------------------------------------------------------------------------|-----------------------------------------------------------------------------------------------------------------------------------------------------------------|----------------------------------------------|----------------------|---------------|-----------|------|
| <p>A novel systems pharmacology model for herbal medicine injection: a case using Reduning injection.</p>                                              | 2014 | <p>Haixing Yang, Wenjuan Zhang, Chao Huang, Wei Zhou, Yao Yao, Zhenzhong Wang, Yan Li, Wei Xiao, Yonghua Wang</p> | <p>Jiangsu Kanion Pharmaceutical Corporation, Northwest A &amp; F University</p>                                                                                | .                                            | <p>TCMSP, STITCH</p> | SEA,          | TTD, KEGG | [26] |
| <p>A network pharmacology approach to determine active compounds and action mechanisms of gen-qin-lian decoction for treatment of type 2 diabetes</p>  | 2014 | <p>Huiying Li, Linhua Zhao, Bo Zhang, Yuyu Jiang, Xu Wang, Yun Guo, Hongxing Liu, Shao Li, Xiaolin Tong</p>       | <p>Tsinghua University, China Academy of Chinese Medical Sciences, Tianjin International Joint Academy of Biotechnology &amp; Medicine, Wuxi Medical School</p> | HerBiomap                                    | drugCIPHER           | Gene ontology | [27]      |      |
| <p>A network pharmacology study of Chinese medicine QiShenYiQi to reveal its underlying multi-compound, multi-target, multi-pathway mode of action</p> | 2014 | <p>Xiang Li, Leihong Wu, Wei Liu, Yecheng Jin, Qian Chen, Linli Wang, Xiaohui Fan, Zheng Li, Yiyu Cheng</p>       | <p>Zhejiang University, Tianjin University of Traditional Chinese Medicine</p>                                                                                  | .                                            | Microarray           | .             | [28]      |      |
| <p>Exploration of the mechanism of pattern-specific treatments in coronary heart disease with network pharmacology approach</p>                        | 2014 | <p>Hao Gu, Li Ma, Yinglong Ren, Wenjing He, Yun Wang, Yanjiang Qiao</p>                                           | <p>Xinjiang Medical University, Beijing University of Chinese Medicine</p>                                                                                      | <p>Traditional Chinese Medicine Database</p> | STITCH               | Gene ontology | [29]      |      |
| <p>Identifying roles of "Jun-Chen-Zuo-Shi" component herbs of QiShenYiQi formula in treating acute</p>                                                 | 2014 | <p>Leihong Wu, Yi Wang, Zheng Li, Boli Zhang, Yiyu Cheng, Xiaohui Fan</p>                                         | <p>Zhejiang University</p>                                                                                                                                      | .                                            | Microarray           | KEGG          | [30]      |      |



|                                                                                                                                                                                          |      |                                                                                                                                                          |                                                                                                   |       |                   |                                                                          |      |
|------------------------------------------------------------------------------------------------------------------------------------------------------------------------------------------|------|----------------------------------------------------------------------------------------------------------------------------------------------------------|---------------------------------------------------------------------------------------------------|-------|-------------------|--------------------------------------------------------------------------|------|
| myocardial ischemia by network pharmacology                                                                                                                                              |      |                                                                                                                                                          |                                                                                                   |       |                   |                                                                          |      |
| Network pharmacology analyses of the antithrombotic pharmacological mechanism of Fufang Xueshuantong Capsule with experimental support using disseminated intravascular coagulation rats | 2014 | Shujing Sheng, Jinxu Wang, Lirong Wang, Hong Liu, Peibo Li, Menghua Liu, Chaofeng Long, Chengshi Xie, Xiangqun Xie, Weiwei Su                            | University of Pittsburgh, Sun Yat-sen University, Guangdong Zhongsheng Pharmaceutical Corporation | HPLC  | Molecular docking | Pubmed, Pubchem, Drugbank, Potential drug target database, TTD, PharmGkb | [31] |
| Network pharmacology study on the mechanism of traditional Chinese medicine for upper respiratory tract infection                                                                        | 2014 | Xinzhuang Zhang, Jiangyong Gu, Liang Cao, Na Li, Yiming Ma, Zhenzhen Su, Gang Ding, Lirong Chen, Xiaojie Xu, Wei Xiao                                    | Jiangsu Kanion Pharmaceutical Corporation, Peking University                                      |       | Molecular docking | TTD, UTRI                                                                | [32] |
| TCMSP: a database of systems pharmacology for drug discovery from herbal medicines                                                                                                       | 2014 | Jinlong Ru, Peng Li, Jinan Wang, Wei Zhou, Bohui Li, Chao Huang, Pidong Li, Zihu Guo, Weiyang Tao, Yinfeng Yang, Xue Xu, Yan Li, Yonghua Wang, Ling Yang | Dalian University of Technology, Chinese Academy of Sciences, Northwest A&F University            | TCMSP | TCMSP             |                                                                          | [33] |
| A network pharmacology approach to determine active ingredients and rationality of herb combinations of Modified-Simiaowan for treatment of                                              | 2015 | Fangli Zhao, Li Guochun, Yanhua Yang, Le Shi, Li Xu, Lian Yin                                                                                            | Nanjing University of Chinese Medicine, Changzhou Seventh People's Hospital                       | TCMSP | Pubmed, Scifinder | KEGG, OMIM, GeneCards                                                    | [34] |

| gout                                                                                                                                                       |      |                                                                                                              |                                                                                                                                                                                             |                                                        |                                    |                     |      |
|------------------------------------------------------------------------------------------------------------------------------------------------------------|------|--------------------------------------------------------------------------------------------------------------|---------------------------------------------------------------------------------------------------------------------------------------------------------------------------------------------|--------------------------------------------------------|------------------------------------|---------------------|------|
| A systems pharmacology approach to decipher the mechanism of danggui-shaoyao-san decoction for the treatment of neurodegenerative diseases                 | 2015 | Yunxia Luo, Qi Wang, Yongbin Zhang                                                                           | Guangzhou University of Chinese Medicine                                                                                                                                                    | TCMSP                                                  | TCMSP                              | Gene ontology, KEGG | [35] |
| Network pharmacology-based prediction of the active ingredients and potential targets of Mahuang Fuzi Xixin decoction for application to allergic rhinitis | 2015 | Feng Tang, Qingfa Tang, Yuanxin Tian, Qin Fan, Yao Huang, Xiaomei Tan                                        | Southern Medical University                                                                                                                                                                 | TCM Database@taiwan, TCMSP                             | TCMSP, Molecular docking           | TTD, PharmGkb       | [36] |
| Systems Pharmacology Dissecting Holistic Medicine for Treatment of Complex Diseases: An Example Using Cardiocerebrovascular Diseases Treated by TCM        | 2015 | Yonghua Wang, Chunli Zheng, Chao Huang, Yan Li, Xuotong Chen, Ziyin Wu, Zhenzhong Wang, Wei Xiao, Boli Zhang | Tianjin University of Traditional Chinese Medicine, Northwest A&F University, Dalian University of Technology, State Key Laboratory of New-Tech for Chinese Medicine Pharmaceutical Process | Literature mining                                      | TCMSP, Molecular docking, Drugbank | KEGG                | [37] |
| Systems pharmacology-based dissection of mechanisms of Chinese medicinal formula Bufei Yishen as an effective treatment for chronic                        | 2015 | Jiansheng Li, Peng Zhao, Ya Li, Yangge Tian, Yonghua Wang                                                    | Henan University of Chinese Medicine, Northwest A&F University                                                                                                                              | Chinese Academy of Sciences Chemistry database, TCMSP, | TCMSP, Molecular docking           | TTD, PharmGkb       | [38] |

| obstructive pulmonary disease                                                                                                                                                       |      |                                                                                                                                                             | Literature mining                                                                            |                                               |                                            |                                                   |      |
|-------------------------------------------------------------------------------------------------------------------------------------------------------------------------------------|------|-------------------------------------------------------------------------------------------------------------------------------------------------------------|----------------------------------------------------------------------------------------------|-----------------------------------------------|--------------------------------------------|---------------------------------------------------|------|
| Anti-osteoporosis effect of Epimedium via an estrogen-like mechanism based on a system-level approach.                                                                              | 2015 | Feifei Xu, Yan Ding, Yingying Guo, Baoyue Liu, Zinong Kou, Wei Xiao, Jingbo Zhu                                                                             | Dalian Polytechnic University, Jiangsu Kanion Pharmaceutical Corporation                     | TCMSP                                         | TCMSP, SEA, STITCH, Molecular docking, TTD | KEGG                                              | [39] |
| Bioactivity-integrated UPLC/Q-TOF-MS of Danhong injection to identify NF-kappaB inhibitors and anti-inflammatory targets based on endothelial cell culture and network pharmacology | 2015 | Xiaoqing Jiang, Bin Lv, Pan Li, Xianghui Ma, Ting Wang, Qian Zhou, Xiaoying Wang, Xiumei Gao                                                                | Tianjin University of Traditional Chinese Medicine                                           | UPLC                                          | PharmMapper                                | Molecule Annotation System                        | [40] |
| The study on the material basis and the mechanism for anti-renal interstitial fibrosis efficacy of rhubarb through integration of metabonomics and network pharmacology             | 2015 | Zheng Xiang, Hao Sun, Xiaojun Cai, Dahui Chen, Xiaoyong Zheng                                                                                               | Wenzhou Medical University                                                                   | Comprehensive natural products in TCM, Reaxys | Molecular docking                          | TTD, Drugbank, OMIM, Genetic Association database | [41] |
| Deciphering the underlying mechanisms of Diesun Miaofang in traumatic injury from a systems pharmacology perspective.                                                               | 2015 | ChunSong Zheng, ChangLong Fu, CaiBin Pan, HongJuan Bao, XingQiang Chen, HongZhi Ye, JinXia Ye, GuangWen Wu, XiHai Li, HuiFeng Xu, XiaoJie Xu, XianXiang Liu | Fujian University of Traditional Chinese Medicine, Xiamen Medical College, Peking University | Chinese Herbal Drug Database                  | Molecular docking                          |                                                   | [42] |

|                                                                                                                                                                           |      |                                                                                                            |                                                                                                          |                     |                        |                     |      |
|---------------------------------------------------------------------------------------------------------------------------------------------------------------------------|------|------------------------------------------------------------------------------------------------------------|----------------------------------------------------------------------------------------------------------|---------------------|------------------------|---------------------|------|
| A Systems Biology Perspective on the Molecular Mechanisms Underlying the Therapeutic Effects of Buyang Huanwu Decoction on Ischemic Stroke                                | 2015 | Qiuyan Guo, Micun Zhong, Haiyu Xu, Xia Mao, Yanqiong Zhang, Na Lin                                         | China Academy of Chinese Medical Sciences                                                                | TCM Database@taiwan | TTD, Molecular docking | Gene ontology, KEGG | [43] |
| A Systems Biology-Based Investigation into the Pharmacological Mechanisms of Sheng-ma-bie-jia-tang Acting on Systemic Lupus Erythematosus by Multi-Level Data Integration | 2015 | Lin Huang, Qi Lv, Fenfen Liu, Tieliu Shi, Chengping Wen                                                    | East China Normal University, Zhejiang Chinese Medical University, Guangxi Medical University            | TCMID               | STITCH, TCMID          | KEGG                | [44] |
| Herb Network Analysis for a Famous TCM Doctor's Prescriptions on Treatment of Rheumatoid Arthritis                                                                        | 2015 | Yan Li, Rui Li, Zibo Ouyang, Shao Li                                                                       | Wannan Medical College, Tsinghua University                                                              | HerBiomap           | drugCIPHER             | KEGG                | [45] |
| Network pharmacology-based antioxidant effect study of zhi-zi-da-huang decoction for alcoholic liver disease                                                              | 2015 | Li An, Fang Feng                                                                                           | China Pharmaceutical University                                                                          | HPLC                | Molecular docking      | .                   | [46] |
| Tetramethylpyrazine identified by a network pharmacology approach ameliorates methotrexate-induced oxidative organ injury                                                 | 2015 | Bo Zhang, Cheng Lu, Ming Bai, Xiaojuan He, Yong Tan, Yanqin Bian, Cheng Xiao, Ge Zhang, Aiping Lu, Shao Li | China Academy of Chinese Medical Sciences, Tsinghua University, China-Japan Friendship Hospital, Tianjin | .                   | drugCIPHER             | KEGG                | [47] |

|                                                                                                                                               |      | International Joint<br>Academy of<br>Biotechnology &<br>Medicine                                                                                                             |                                                                                                              |                   |      |                              |                     |      |
|-----------------------------------------------------------------------------------------------------------------------------------------------|------|------------------------------------------------------------------------------------------------------------------------------------------------------------------------------|--------------------------------------------------------------------------------------------------------------|-------------------|------|------------------------------|---------------------|------|
| Molecular targets of Chinese herbs: a clinical study of hepatoma based on network pharmacology                                                | 2016 | Li Gao, Xiaodong Wang, Yangyang Niu, Dandan Duan, Xue Yang, Jian Hao, Cuihong Zhu, Dan Chen, Kexin Wang, Xuemei Qin, Xiongzhi Wu                                             | Shanxi University, Tianjin Medical University, Tianjin People's Hospital                                     | TCMSP, TCMID, PTD | TCM- | ChemMapper                   | HIT                 | [48] |
| Systematic understanding the mechanisms of vitiligo pathogenesis and its treatment by Qubaibabuqi formula                                     | 2016 | Tianli Pei, Chunli Zheng, Chao Huang, Xuotong Chen, Zihu Guo, Yingxue Fu, Jianling Liu, Yonghua Wang                                                                         | Northwest A&F University                                                                                     | TCMSP             |      | WES                          | Gene ontology, KEGG | [49] |
| Systems Pharmacology Dissection of the Integrated Treatment for Cardiovascular and Gastrointestinal Disorders by Traditional Chinese Medicine | 2016 | Wenjuan Zhang, Qin Tao, Zihu Guo, Yingxue Fu, Xuotong Chen, Piar Sharali, Mohamed Shahan, Jinglin Zhu, Jun Xue, Yaofei Bai, Ziyin Wu, Zhenzhong Wang, Wei Xiao, Yonghua Wang | Chinese Medicine Pharmaceutical Process, Northwest A&F University, Northwest University                      | TCMSP             |      | TCMSP, Molecular docking     | Gene ontology, KEGG | [50] |
| Systems pharmacology exploration of botanic drug pairs reveals the mechanism for treating different diseases                                  | 2016 | Wei Zhou, Jinan Wang, Ziyin Wu, Chao Huang, Aiping Lu, Yonghua Wang                                                                                                          | Shihezi University, Northwest A&F University, Shanghai Academy of Chinese Medical Sciences, China Academy of | TCMSP             |      | HIT, TTD, SEA, STITCH, TCMSP | HIT, TTD, Drugbank  | [51] |

| Chinese Medical Sciences                                                                                                                                    |      |                                                                                                                                             |                                                                                        |                          |                          |                     |      |
|-------------------------------------------------------------------------------------------------------------------------------------------------------------|------|---------------------------------------------------------------------------------------------------------------------------------------------|----------------------------------------------------------------------------------------|--------------------------|--------------------------|---------------------|------|
| Systems Pharmacology Uncovers the Multiple Mechanisms of Xijiao Dihuang Decoction for the Treatment of Viral Hemorrhagic Fever                              | 2016 | Jianling Liu, Tianli Pei, Jiexin Mu, Chunli Zheng, Xuotong Chen, Chao Huang, Yingxue Fu, Zongsuo Liang, Yonghua Wang                        | Zhejiang Sci-Tech University, Northwest University, Northwest A&F University           | TCMSP                    | TCMSP, Molecular docking | Gene ontology, KEGG | [52] |
| Systems-Pharmacology Dissection of Traditional Chinese Medicine Compound Saffron Formula Reveals Multi-scale Treatment Strategy for Cardiovascular Diseases | 2016 | Jianling Liu, Jiexin Mu, Chunli Zheng, Xuotong Chen, Zihu Guo, Chao Huang, Yingxue Fu, Guihua Tian, Hongcai Shang, Yonghua Wang             | Northwest University, Northwest A&F University, Beijing University of Chinese Medicine | TCMSP                    | WES                      | Gene ontology, KEGG | [53] |
| Network pharmacology dissection of multiscale mechanisms of herbal medicines in stage IV gastric adenocarcinoma treatment.                                  | 2016 | Li Gao, Jian Hao, YangYang Niu, Miao Tian, Xue Yang, CuiHong Zhu, XiuLi Ding, XiaoHui Liu, HaoRan Zhang, Chang Liu, XueMei Qin, XiongZhi Wu | Shanxi University, Tianjin Medical University                                          | TCMSP                    | ChemMapper, HIT          |                     | [54] |
| Systems Pharmacology Based Study of the Molecular Mechanism of SiNiSan Formula for Application in Nervous and Mental Diseases.                              | 2016 | Xia Shen, Zhenyu Zhao, Xuan Luo, Hao Wang, Benxiang Hu, Zihu Guo                                                                            | Shaanxi University of Chinese Medicine, Northwest A&F University                       | TCMSP, Literature mining | WES                      | PharmGkb            | [55] |
| Drug discovery of neurodegenerative disease                                                                                                                 | 2016 | Zhipeng Ke, Xinzhuang Zhang,                                                                                                                | Peking University, Jiangsu Kanion                                                      | TCMN                     | Molecular docking        | TTD, Drugbank       | [56] |

|                                                                                                                                                                              |      |                                                                                                                     |                                                                                                                           |                                                                                           |                       |                                |      |
|------------------------------------------------------------------------------------------------------------------------------------------------------------------------------|------|---------------------------------------------------------------------------------------------------------------------|---------------------------------------------------------------------------------------------------------------------------|-------------------------------------------------------------------------------------------|-----------------------|--------------------------------|------|
| through network pharmacology approach in herbs                                                                                                                               |      | Zeyu Cao, Yue Ding, Na Li, Liang Cao, Tuanjie Wang, Chenfeng Zhang, Gang Ding, Zhenzhong Wang, Xiaojie Xu, Wei Xiao | Pharmaceutical Corporation                                                                                                |                                                                                           |                       |                                |      |
| A novel strategy of profiling the mechanism of herbal medicines by combining network pharmacology with plasma concentration determination and affinity constant measurement. | 2016 | Langdong Chen, Diya Lv, Dongyao Wang, Xiaofei Chen, Zhenyu Zhu, Yan Cao, Yifeng Chai                                | Second Military Medical University                                                                                        | Chemistry database of Shanghai Institute of Organic Chemistry, Chinese Academy of Science |                       | Molecular docking              | [57] |
| A network analysis of the Chinese medicine Lianhua-Qingwen formula to identify its main effective components                                                                 | 2016 | Chunhua Wang, Yi Zhong, Yan Zhang, Jinping Liu, Yuefei Wang, Weina Jia, Guocai Wang, Zheng Li, Yan Zhu, Xiumei Gao  | Tianjin University of Traditional Chinese Medicine, Zhejiang University, Jinan University of Traditional Chinese Medicine | UPLC                                                                                      | TCMSP, STITCH         | OMIM                           | [58] |
| A Network Pharmacology Approach to Explore the Pharmacological Mechanism of Xiaoyao Powder on Anovulatory Infertility                                                        | 2016 | Huiping Liu, Liuting Zeng, Kailin Yang, Guomin Zhang                                                                | Hunan University of Chinese Medicine                                                                                      | TCM Database@taiwan, TCMSP                                                                | PharmMapper           | TTD, KEGG                      | [59] |
| BATMAN-TCM: a Bioinformatics Analysis Tool for Molecular                                                                                                                     | 2016 | Zhongyang Liu, Feifei Guo, Yong Wang, Chun Li, Xinlei Zhang,                                                        | Beijing Institute of Radiation Medicine, National Center for                                                              | TCMID                                                                                     | BATMAN-TCM, Molecular | Gene ontology, KEGG, OMIM, TTD | [60] |

|                                                                                                                                                                  |      |                                                                                                 |                                                                                                                                                        |                                                 |                      |                     |      |
|------------------------------------------------------------------------------------------------------------------------------------------------------------------|------|-------------------------------------------------------------------------------------------------|--------------------------------------------------------------------------------------------------------------------------------------------------------|-------------------------------------------------|----------------------|---------------------|------|
| mechANism of Traditional Chinese Medicine                                                                                                                        |      | Honglei Li, Lihong Diao, Jiangyong Gu, Wei Wang, Dong Li, Fuchu He                              | Protein Sciences Beijing, Chinese Academy of Medical Sciences, Beijing University of Chinese Medicine, Beijing Genestone Technology, Peking University |                                                 | docking              |                     |      |
| Bioinformatics investigation of therapeutic mechanisms of Xuesaitong capsule treating ischemic cerebrovascular rat model with comparative transcriptome analysis | 2016 | Jiangquan Liao, Benjun Wei, Hengwen Chen, Yongmei Liu, Jie Wang                                 | China Academy of Chinese Medical Sciences, Beijing University of Chinese Medicine, Hubei University of Chinese Medicine                                |                                                 | Microarray           | Gene ontology, KEGG | [61] |
| Herb-target interaction network analysis helps to disclose molecular mechanism of traditional Chinese medicine                                                   | 2016 | Hao Liang, Hao Ruan, Qi Ouyang, Luhua Lai                                                       | Peking University                                                                                                                                      | Pharmacopoeia of the People's Republic of China | Molecular docking    |                     | [62] |
| Identification of the anti-tumor activity and mechanisms of nuciferine through a network pharmacology approach                                                   | 2016 | Quan Qi, Rui Li, Huiying Li, Yubing Cao, Ming Bai, Xiaojing Fan, Shuyan Wang, Bo Zhang, Shao Li | Tianjin University of Traditional Chinese Medicine, Tsinghua University, Tianjin International Joint Academy of Biotechnology & Medicine               | drugCHIPER-CS                                   | drugCIPHER           |                     | [63] |
| Study on material base and action mechanism of compound Danshen                                                                                                  | 2016 | Wei Zhou, Wenfeng Yuan, Chao Chen, Shumei Wang,                                                 | Guangdong Pharmaceutical University                                                                                                                    | TCMSP                                           | Tanimoto coefficient | Gene ontology, KEGG | [64] |



|                                                                                                                                                                                                |      |                                                                                                          |                                                                                                      |                          |             |                                                     |      |
|------------------------------------------------------------------------------------------------------------------------------------------------------------------------------------------------|------|----------------------------------------------------------------------------------------------------------|------------------------------------------------------------------------------------------------------|--------------------------|-------------|-----------------------------------------------------|------|
| dripping pills for treatment of atherosclerosis based on modularity analysis                                                                                                                   |      | Shengwang Liang                                                                                          |                                                                                                      |                          |             |                                                     |      |
| To Unveil the Molecular Mechanisms of Qi and Blood through Systems Biology-Based Investigation into Si-Jun-Zi-Tang and Si-Wu-Tang formulae                                                     | 2016 | Jing Sun, Li Zhang, Yujun He, Kun Zhang, Liping Wu, Yongsheng Fan, Zhijun Xie                            | Zhejiang Chinese Medical University, Hangzhou Traditional Chinese Medical Hospital                   | TCMID                    | STITCH      | Gene ontology, KEGG                                 | [65] |
| Identification of "Multiple Components-Multiple Targets-Multiple Pathways" Associated with Naoxintong Capsule in the Treatment of Heart Diseases Using UPLC/Q-TOF-MS and Network Pharmacology. | 2016 | Xianghui Ma, Bin Lv, Pan Li, Xiaoqing Jiang, Qian Zhou, Xiaoying Wang, Xiumei Gao                        | Tianjin University of Traditional Chinese Medicine                                                   | UPLC                     | PharmMapper | Bio database                                        | [66] |
| Systems-biology dissection of mechanisms and chemical basis of herbal formula in treating chronic myocardial ischemia.                                                                         | 2016 | Shuzhen Guo, Peng Li, Bangze Fu, Wenjing Chuo, Kuo Gao, Wuxia Zhang, Junyao Wang, Jianxin Chen, Wei Wang | Beijing University of Chinese Medicine, Shanxi Agricultural University                               | TCMSP, Literature mining | Microarray  | Drugbank, TTD, FDA orange book, Gene ontology, KEGG | [67] |
| Genomic expression profiling and bioinformatics analysis on diabetic nephrology with ginsenoside Rg3.                                                                                          | 2016 | Juan Wang, Chunli Cui, Li Fu, Zili Xiao, Nanzi Xie, Yang Liu, Lu Yu, Haifeng Wang, Bangzhen Luo          | Tongji University, Shanghai Jinfang Biotechnology Corporation, Dalian Fusheng Natural Pharmaceutical |                          | RNA-seq     | Gene ontology, KEGG                                 | [68] |

| Development Corporation                                                                                                                              |      |                                                                                              |                                                             |                            |                          |                                        |      |
|------------------------------------------------------------------------------------------------------------------------------------------------------|------|----------------------------------------------------------------------------------------------|-------------------------------------------------------------|----------------------------|--------------------------|----------------------------------------|------|
| Systems Pharmacology Dissection of Multiscale Mechanisms of Action for Herbal Medicines in Treating Rheumatoid Arthritis                             | 2017 | Jinghui Wang, Yan Li, Yinfeng Yang, Jian Du, Miaoqing Zhao, Feng Lin, Shuwei Zhang, Bin Wang | Dalian University of Technology, Dalian Ocean University    | TCMSP                      | TCMSP, Molecular docking | KEGG                                   | [69] |
| Uncovering the Pharmacological Mechanism of Astragalus Salvia Compound on Pregnancy-Induced Hypertension Syndrome by a Network Pharmacology Approach | 2017 | Liuting Zeng, Kailin Yang, Jinwen Ge                                                         | Hunan University of Chinese Medicine                        | TCM Database@taiwan, TCMSP | PharmMapper              | Gene ontology                          | [70] |
| A network pharmacology approach to establish the pharmacological mechanism of JiaWeiXianJiTang on inflammatory bowel disease                         | 2017 | Lingjia Tao, Wenting Chen, Lin Jing, Qing Ji, Jianlin Ren                                    | Shanghai University of Traditional Chinese Medicine         | TCM-PTD                    | TCM-PTD                  | Wangfang Database, CNKI, database, VIP | [71] |
| Network pharmacology-based approach of novel traditional Chinese medicine formula for treatment of acute skin inflammation in silico                 | 2017 | Hsinchieh Tang, Hungjin Huang, Chengchun Lee, Calvin Yuchian Chen                            | China Medical University Hospital, China Medical University | .                          | Molecular docking        | .                                      | [72] |
| Network pharmacology-                                                                                                                                | 2017 | Guohua Yu, Yanqiong                                                                          | China Academy of                                            | Chinese                    | Medchem,                 | OMIM, KEGG                             | [73] |

|                                                                                                                                                                                                                           |      |                                                                                                  |                                                                              |                                                                                                               |                                |                     |      |
|---------------------------------------------------------------------------------------------------------------------------------------------------------------------------------------------------------------------------|------|--------------------------------------------------------------------------------------------------|------------------------------------------------------------------------------|---------------------------------------------------------------------------------------------------------------|--------------------------------|---------------------|------|
| based identification of key pharmacological pathways of Yin-Huang-Qing-Fei capsule acting on chronic bronchitis                                                                                                           |      | Zhang, Weiqiong Ren, Ling Dong, Junfang Li, Ya Geng, Yi Zhang, Defeng Li, Haiyu Xu, Hongjun Yang | Chinese Medical Sciences                                                     | Academy of Drugbank Sciences Chemistry database                                                               |                                |                     |      |
| PDTM: a systems pharmacology platform of traditional Chinese medicine for psoriasis.                                                                                                                                      | 2017 | Dongmei Wang, Jiangyong Gu, Wei Zhu, Fang Luo, Lirong Chen, Xiaojie Xu, Chuanjian Lu             | Guangdong Provincial Academy of Chinese Medical Sciences                     | Reaxys, Chinese Natural Product Database, Traditional Chinese Medicine Database, Chinese Herbal Drug Database | Molecular docking              | OMIM, KEGG          | [74] |
| Predicted molecular targets and pathways for gormacrone, curdione, and furanodiene in the treatment of breast cancer using a bioinformatics approach                                                                      | 2017 | Qi Kong, Yong Ma, Jie Yu, Xiuping Chen                                                           | Peking Union Medical College, Shanxian Central Hospital, University of Macau |                                                                                                               | BATMAN-TCM, Molecular docking  | Gene ontology, KEGG | [75] |
| The Combination of Three Components Derived from Sheng MaiSan Protects Myocardial Ischemic Diseases and Inhibits Oxidative Stress via Modulating MAPKs and JAK2-STAT3 Signaling Pathways Based on Bioinformatics Approach | 2017 | Fang Li, Yu Zhang, Donglin Zeng, Yu Xia, Xiaoxue Fan, Yisha Tan, Junping Kou, Boyang Yu          | China Pharmaceutical University                                              |                                                                                                               | PharmMapper, Literature mining | Gene ontology, KEGG | [76] |

|                                                                                                                                                                                  |      |                                                                                                       |                                                                                                                                         |                                                                              |                   |                          |
|----------------------------------------------------------------------------------------------------------------------------------------------------------------------------------|------|-------------------------------------------------------------------------------------------------------|-----------------------------------------------------------------------------------------------------------------------------------------|------------------------------------------------------------------------------|-------------------|--------------------------|
| A Network Pharmacology-Based Study on the Hepatoprotective Effect of Fructus Schisandrae.                                                                                        | 2017 | Ming Hong, Yongsheng Zhang, Sha Li, Horyue Tan, Yue Ning, Wang, Shuzhen Mu, Xiaojiang Hao, Yibin Feng | The University of Hong Kong, Guangzhou University of Chinese Medicine, Zhejiang Chinese Medical University, Chinese Academy of Sciences | Molecular docking                                                            | Molecular docking | [77]                     |
| A Biomedical Investigation of the Hepatoprotective Effect of Radix salviae miltiorrhizae and Network Pharmacology-Based Prediction of the Active Compounds and Molecular Targets | 2017 | Ming Hong, Sha Li, Ning Wang, Horyue Tan, Fan Cheung, Yibin Feng                                      | The University of Hong Kong                                                                                                             | TCMSP, TCM Database@taiwan                                                   | TCMSP             | [78]                     |
| A Methodology for Cancer Therapeutics by Systems Pharmacology-Based Analysis: A Case Study on Breast Cancer-Related Traditional Chinese Medicines                                | 2017 | Yan Li, Jinghui Wang, Feng Lin, Yinfeng Yang, Sushing Chen                                            | University of Florida, Dalian University of Technology                                                                                  | Chinese Academy of Sciences Chemistry database, Chinese Herbal Drug Database | TCMSP             | KEGG, Gene ontology [79] |
| Exploring the pharmacological mechanism of Yanghe Decoction on HER2-positive breast cancer by a network pharmacology approach                                                    | 2017 | Liuting Zeng, Kailin Yang                                                                             | Hunan University of Chinese Medicine                                                                                                    | TCM Database@taiwan, TCMSP                                                   | PharmMapper       | Gene ontology, KEGG [80] |

|                                                                                                                                                                      |      |                                                                                                                                |                                                                                                                            |                          |                          |                                |      |
|----------------------------------------------------------------------------------------------------------------------------------------------------------------------|------|--------------------------------------------------------------------------------------------------------------------------------|----------------------------------------------------------------------------------------------------------------------------|--------------------------|--------------------------|--------------------------------|------|
| Identification of the active compounds and significant pathways of yinchenhao decoction based on network pharmacology                                                | 2017 | Jihan Huang, Fan Cheung, Horyue Tan, Ming Hong, Ning Wang, Juan Yang, Yibin Feng, Qingshan Zheng                               | Shanghai University of Traditional Chinese Medicine, The University of Hong Kong                                           | TCMSP                    | TCMSP                    | Gene ontology, KEGG, OMIM      | [81] |
| Molecular Targets and Associated Potential Pathways of Danlu Capsules in Hyperplasia of Mammary Glands Based on Systems Pharmacology                                 | 2017 | Jihan Huang, Haitao Tang, Sumin Cao, Yingchun He, Yibin Feng, Kun Wang, Qingshan Zheng                                         | Shanghai University of Traditional Chinese Medicine, The University of Hong Kong, Suzhong Pharmaceutical Group Corporation | TCMSP                    | TCMSP                    | Gene ontology, KEGG, OMIM      | [82] |
| Systems-level mechanisms of action of Panax ginseng: a network pharmacological approach                                                                              | 2017 | Sayoon Park, Jihun Park, Hyosu Kim, Choongyeol Lee, Hae-jeung Lee, Kisung Kang, Chang-eop Kim                                  | Gachon University                                                                                                          | TCMSP                    | TCMSP                    | PANTHER, OMIM, KEGG            | [83] |
| Network pharmacology-based and clinically relevant prediction of the active ingredients and potential targets of Chinese herbs in metastatic breast cancer patients. | 2017 | Yu Mao, Jian Hao, ZiQi Jin, YangYang Niu, Xue Yang, Dan Liu, Rui Cao, XiongZhi Wu                                              | Tianjin Medical University                                                                                                 | TCMSP, TCMID             | ChemMapper, HIT          | KEGG, TTD                      | [84] |
| Network-pharmacology-based validation of TAMS/CXCL-1 as key mediator of XIAOPI formula preventing breast cancer development and metastasis.                          | 2017 | Neng Wang, Yifeng Zheng, Jiangyong Gu, Youli Cai, Shengqi Wang, Fengxue Zhang, Jianping Chen, Honglin Situ, Yi Lin, Zhiyu Wang | Guangzhou University of Chinese Medicine, The University of Hong Kong                                                      | TCMSP, TCMID, BATMAN-TCM | TCMSP, TCMID, BATMAN-TCM | GeneCards, KEGG, Gene ontology | [85] |

|                                                                                                                                                    |      |                                                                                                                          |                                                                                                                                                                               |                                              |               |                                      |      |
|----------------------------------------------------------------------------------------------------------------------------------------------------|------|--------------------------------------------------------------------------------------------------------------------------|-------------------------------------------------------------------------------------------------------------------------------------------------------------------------------|----------------------------------------------|---------------|--------------------------------------|------|
| A Network Pharmacology Approach to Determine the Active Components and Potential Targets of Curculigo Orchioides in the Treatment of Osteoporosis. | 2017 | Nani Wang, Guizhi Zhao, Yang Zhang, Xuping Wang, Lisha Zhao, Pingcui Xu, Dan Shou                                        | Zhejiang Academy of Traditional Chinese Medicine, Second Military Medical University                                                                                          | UPLC, TCMSP                                  | PharmMapper   | KEGG                                 | [86] |
| Network pharmacology-based study on the mechanism of action for herbal medicines in Alzheimer treatment                                            | 2017 | Jiansong Fang, Ling Wang, Tian Wu, Cong Yang, Li Gao, Haobin Cai, Junhui Liu, Shuhuan Fang, Yunbo Chen, Wen Tan, Qi Wang | Guangzhou University of Chinese Medicine, South China University of Technology, Shanxi University, Guangxi University of Chinese Medicine, Guangdong University of Technology | TCMSP, TCMID, TimTec plant extracts database | AlzhCPI       | KEGG                                 | [87] |
| A network pharmacology approach to investigate the pharmacological effects of Guizhi Fuling Wan on uterine fibroids                                | 2017 | Liuting Zeng, Kailin Yang, Huiping Liu, Guomin Zhang                                                                     | Hunan University of Chinese Medicine                                                                                                                                          | SciFinder                                    | PharmMapper   | KEGG, Gene ontology, OMIM, GeneCards | [88] |
| A network pharmacology-based strategy deciphers the underlying molecular mechanisms of Qixuehe Capsule in the treatment of menstrual disorders     | 2017 | Yanqiong Zhang, Xia Mao, Jing Su, Ya Geng, Rui Guo, Shihuan Tang, Junfang Li, Xuefeng Xiao, Haiyu Xu, Hongjun Yang       | China Academy of Chinese Medical Sciences, Shandong University of Traditional Chinese Medicine, Tianjin University of Traditional Chinese Medicine                            | Organchem                                    | Metadrug      | Drugbank                             | [89] |
| Combining Chemical Profiling and Network                                                                                                           | 2017 | Tongchuan Suo, Jinping Liu, Xi Chen,                                                                                     | Tianjin University of Traditional Chinese                                                                                                                                     | UPLC                                         | TCMSP, STITCH | KEGG                                 | [90] |

|                                                                                                                                                                                    |      |                                                                                                                       |                                                                                               |                                                                   |               |                                                              |      |  |
|------------------------------------------------------------------------------------------------------------------------------------------------------------------------------------|------|-----------------------------------------------------------------------------------------------------------------------|-----------------------------------------------------------------------------------------------|-------------------------------------------------------------------|---------------|--------------------------------------------------------------|------|--|
| Analysis to Investigate the Pharmacology of Complex Prescriptions in Traditional Chinese Medicine                                                                                  |      | Hua Yu, Tenglong Wang, Congcong Li, Yuefei Wang, Chunhua Wang, Zheng Li                                               | Medicine                                                                                      |                                                                   |               |                                                              |      |  |
| Design of new traditional Chinese medicine herbal formulae for treatment of type 2 diabetes mellitus based on network pharmacology.                                                | 2017 | Ruifeng Hu, Xiaobo Sun                                                                                                | Chinese Academy of Medical Sciences                                                           | Medicinal Plants Database                                         | TarNet        | T2D-Db, T-HOD, T2D@ZJU                                       | [91] |  |
| Dissecting the Underlying Pharmaceutical Mechanism of Chinese Traditional Medicine Yun-Pi-Yi-Shen-Tong-Du-Tang Acting on Ankylosing Spondylitis through Systems Biology Approaches | 2017 | Duoli Xie, Lin Huang, Guanghui Zhao, Yiran Yu, Jiawei Gao, Haichang Li, Chengping Wen                                 | Zhejiang Chinese Medical University, Guangzhou University of Chinese Medicine                 | TCMID                                                             | TCMID, STITCH | Gene ontology, KEGG                                          | [92] |  |
| Molecular mechanisms of the analgesic action of Wutou Decoction on neuropathic pain in mice revealed using microarray and network analysis                                         | 2017 | Yanqiong Zhang, Chao Wang, Qiuyan Guo, Chunyan Zhu, Chen Yan, Danni Sun, Qionghong Xu, Na Lin                         | China Academy of Chinese Medical Sciences                                                     | .                                                                 | Microarray    | KEGG                                                         | [93] |  |
| Network pharmacology exploration reveals endothelial inflammation as a common mechanism for stroke and coronary artery disease treatment of                                        | 2017 | Ming Lyu, Chunlin Yan, Haixin Liu, Taiyi Wang, Xinhui Shi, Jinping Liu, John Orgah, Guanwei Fan, Jihong Han, Xiaoying | Tianjin University of Traditional Chinese Medicine, Nankai University, Harvard Medical School | TCMSP, TCM Database@taiwan, TCM-ID, TCMGeneDIT, Literature mining | TCMSP, TCMID  | IPA, OMIM, CADGene, NCBI Gene database, GeneCards, MalaCards | [94] |  |

|                                                                                                                                                     |      |                                                                                                                             |                                                                                                                                   |       |                                                 |                                                  |      |
|-----------------------------------------------------------------------------------------------------------------------------------------------------|------|-----------------------------------------------------------------------------------------------------------------------------|-----------------------------------------------------------------------------------------------------------------------------------|-------|-------------------------------------------------|--------------------------------------------------|------|
| Danhong injection                                                                                                                                   |      | Wang, Yan Zhu                                                                                                               |                                                                                                                                   |       |                                                 |                                                  |      |
| Systems Pharmacology-based strategy to screen new adjuvant for hepatitis B vaccine from Traditional Chinese Medicine <i>Ophiocordyceps sinensis</i> | 2017 | Jingbo Wang, Rui Liu, Baoxiu Liu, Yan Yang, Jun Xie, Naishuo Zhu                                                            | Fudan University                                                                                                                  | TCMSP | TCMSP                                           | Gene ontology, KEGG                              | [95] |
| Deciphering Key Pharmacological Pathways of Qingdai Acting on Chronic Myeloid Leukemia Using a Network Pharmacology-Based Strategy                  | 2018 | Huayao Li, Lijuan Liu, Cun Liu, Jing Zhuang, Chao Zhou, Jing Yang, Chundi Gao, Gongxi Liu, Qingliang Lv, Changgang Sun,     | Shandong University of Traditional Chinese Medicine, Affiliated Hospital of Weifang Medical University, Weifang People's Hospital | TCMSP | SwissTargetPrediction, Molecular docking        | Pubmed, Drugbank, OMIM, Gene ontology, KEGG, TTD | [96] |
| Exploring Pharmacological Mechanisms of Xuefu Zhuyu Decoction in the Treatment of Traumatic Brain Injury via a Network Pharmacology Approach        | 2018 | Zhiping Miao, Chu Chen, Mohamed Shahen, Siddiq Rahmanur, Alagawany, Mahmoud, Mohamed E Abd Elhack, Heping Zhao, Airong Qian | Central South University, Xinjiang Medical University, Xiangya Hospital                                                           | TCMSP | TCMSP, Molecular docking                        | TTD, OMIM, Gene ontology, KEGG                   | [97] |
| Exploring the Mechanism of Danshen against Myelofibrosis by Network Pharmacology and Molecular Docking                                              | 2018 | Jie Li, Xiaoran Ma, Cun Liu, Huayao Li, Jing Zhuang, Chundi Gao, Chao Zhou, Lijuan Liu, Kejia Wang, Changgang Sun           | Shandong University of Traditional Chinese Medicine, Weifang Traditional Chinese Hospital, Qingdao University                     | TCMSP | SwissTargetPrediction, TCMSP, Molecular docking | OMIM, TTD, Gene ontology, KEGG                   | [98] |
| Integrated Metabolomics and Network Pharmacology Approach to                                                                                        | 2018 | Hanqing Pang, Shijun Yue, Yuping Tang, Yanyan Chen, Yajie                                                                   | Shaanxi University of Chinese Medicine, Nanjing University of                                                                     | TCMSP | PharmMapper, STITCH, SEA, Drugbank,             | KEGG                                             | [99] |



|                                                                                                                                                       |      |                                                                                                                         |                                                                                                                                       |                                                                               |                               |                                        |       |
|-------------------------------------------------------------------------------------------------------------------------------------------------------|------|-------------------------------------------------------------------------------------------------------------------------|---------------------------------------------------------------------------------------------------------------------------------------|-------------------------------------------------------------------------------|-------------------------------|----------------------------------------|-------|
| Explain Possible Action Mechanisms of Xin-Sheng-Hua Granule for Treating Anemia                                                                       |      | Tan, Yujie Cao, Xuqin Shi, Guisheng Zhou, An Kang, Shengliang Huang, Yajun Shi, Jing Sun, Zhishu Tang, Jinao Duan       | Chinese Medicine, Jiangsu Revolve Pharmaceutical Corporation                                                                          |                                                                               | TTD, HIT, Literature mining   |                                        |       |
| Investigate the mechanisms of Chinese medicine Fuzhengkangai towards EGFR mutation-positive lung adenocarcinomas by network pharmacology.             | 2018 | Zhitong Bing, Zhiyuan Cheng, Danfeng Shi, Xinkui Liu, Jinhui Tian, Xiaojun Yao, Jingyun Zhang, Yongfeng Wang, Kehu Yang | School of Basic Medical Science of Lanzhou University                                                                                 | TCMSP                                                                         | Microarray, Molecular docking | KEGG                                   | [100] |
| Systems Pharmacology Dissection of Multi-Scale Mechanisms of Action of Huo-Xiang-Zheng-Qi Formula for the Treatment of Gastrointestinal Diseases.     | 2018 | Miaoqing Zhao, Yangyang Chen, Chao Wang, Wei Xiao, Shusheng Chen, Shuwei Zhang, Ling Yang, Yan Li                       | Dalian University of Technology, Northwest A&F University, University of Florida, Shanghai University of Traditional Chinese Medicine | TCMSP, Chinese Academy of Sciences Chemistry, HIT, TCM Database@taiwan, TCMID | TCMSP, Molecular docking      | TTD, DrugBank, PharmGkb, Gene ontology | [101] |
| A Network Pharmacology-Based Approach to Investigate the Novel TCM Formula against Huntington's Disease and Validated by Support Vector Machine Model | 2018 | Wenjie Dai, Hsinyi Chen, Calvin Yuchian Chen                                                                            | Sun Yat-sen University                                                                                                                | TCM Database@taiwan                                                           | QSAR, Molecular docking       | KEGG                                   | [102] |
| A Systems Biology-Based Approach to Uncovering Molecular Mechanisms Underlying Effects of Traditional Chinese                                         | 2018 | Chao Zhou, Lijuan Liu, Jing Zhuang, Junyu Wei, Tingting Zhang, Chundi Gao, Cun Liu, Huayao Li, Hongzong                 | WeiFang Traditional Chinese Hospital, Shandong University of Traditional Chinese Medicine, Qingdao                                    | CHDD                                                                          | Molecular docking             | OMIM                                   | [103] |

|                                                                                                                                             |      |                                                                                                                                                                                                         |                                                                                                                                        |                            |                                    |                                                                              |  |       |
|---------------------------------------------------------------------------------------------------------------------------------------------|------|---------------------------------------------------------------------------------------------------------------------------------------------------------------------------------------------------------|----------------------------------------------------------------------------------------------------------------------------------------|----------------------------|------------------------------------|------------------------------------------------------------------------------|--|-------|
| Medicine Qingdai in Chronic Myelogenous Leukemia,                                                                                           |      | Si, Changgang Sun                                                                                                                                                                                       | University, Affiliated Hospital of Weifang Medical University                                                                          |                            |                                    |                                                                              |  |       |
| A systems pharmacology-oriented discovery of a new therapeutic use of the TCM formula Liuweiwuling for liver failure                        | 2018 | Jiabo Wang, Herong Cui, Ruilin Wang, Congen Zhang, Ming Niu, Zhaofang Bai, Genhua Xu, Pengyan Li, Wenyan Jiang, Jingjing Han, Xiao Ma, Guangming Cai, Ruisheng Li, Liping Zhang, Xiaohe Xiao            | 302 Military Hospital of China, Beijing University of Traditional Chinese Medicine, Chengdu University of Traditional Chinese Medicine | TCMSP, TCM Database@Taiwan | PharmMapper                        | OMIM, Gene ontology, KEGG                                                    |  | [104] |
| Network pharmacology-based strategy for predicting active ingredients and potential targets of Yangxinshi tablet for treating heart failure | 2018 | Langdong Chen, Yan Cao, Hai Zhang, Diya Lv, Yahong Zhao, Yanjun Liu, Guan Ye, Yifeng Chai                                                                                                               | Second Military Medical University, Tongji University School of Medicine, Shanghai Pharmaceuticals Holding Corporation                 | In-house database          | Molecular docking                  | Drugbank, PharmGkb, Potential Drug Target Database, KEGG, TTD, Gene ontology |  | [105] |
| Network Pharmacology Uncovers Anticancer Activity of Mamea-Type Coumarins from Calophyllum brasiliense                                      | 2018 | JuanCarlos Gómez-Verjan, NadiaAlejandra Rivero-Segura, Edgar Estrella-Parra, Ruth Rincón-Heredia, Abraham Madariaga-Mazón, Edgar Flores-Soto, Mario González-Meljem, Marco Cerbón, Ricardo Reyes-Chilpa | Instituto Nacional de Geriatria, Universidad Nacional Autónoma de México                                                               | NMR                        | DAAR-CPI, SEA, SwissTarget, STITCH |                                                                              |  | [106] |

|                                                                                                                                             |      |                                                                                                                                          |                                                                                                                                                  |                                              |                      |                                           |       |
|---------------------------------------------------------------------------------------------------------------------------------------------|------|------------------------------------------------------------------------------------------------------------------------------------------|--------------------------------------------------------------------------------------------------------------------------------------------------|----------------------------------------------|----------------------|-------------------------------------------|-------|
| A Systems-Level Analysis of Mechanisms of Platycodon grandiflorum Based on A Network Pharmacological Approach                               | 2018 | Musun Park, Sayoon Park, Hae-jeung Lee, Chang-eop Kim                                                                                    | Gachon University                                                                                                                                | TCMSP                                        | TCMSP                | PANTHER, KEGG, OMIM                       | [107] |
| Network pharmacology-based prediction of active compounds and molecular targets in Yijin-Tang acting on hyperlipidaemia and atherosclerosis | 2018 | Ayeong Lee, Won Park, Taewook Kang, Minho Cha, Jinmi Chun                                                                                | Korea Institute of Oriental Medicine, Insilicogen Corporation, Sookmyung Women's University                                                      | Korean traditional knowledge portal database | STITCH               | KEGG                                      | [108] |
| Protective Effect of Artemisia argyi and Its Flavonoid Constituents against Contrast-Induced Cytotoxicity by Iodixanol in LLC-PK1 Cells     | 2018 | Dahae Lee, Chang-eop Kim, Sayoon Park, Kemok Kim, Nguyentuan Hiep, Dongho Lee, Hyukjai Jang, Jaewook Lee, Kisung Kang                    | Sungkyunkwan University, Gachon University, Korea University, University of Ulsan College of Medicine, Korea Institute of Science and Technology |                                              | TCMSP                | PharmGkb, TTD                             | [109] |
| Systematic Investigation of Scutellariae Barbatae Herba for Treating Hepatocellular Carcinoma Based on Network Pharmacology                 | 2018 | Benjiao Gong                                                                                                                             | Qingdao University, Yantai Hospital of Traditional Chinese Medicine,                                                                             | TCMSP                                        | PubChem, PharmMapper | OncoDB.HCC, Liverome, Gene ontology, KEGG | [110] |
| Systematic Understanding of the Mechanism of Baicalin against Ischemic Stroke through a Network Pharmacology Approach                       | 2018 | Tian Xu, Chongyang Ma, Shuning Fan, Nang Deng, Yajun Lian, Ling Tan, Weizhe Du, Shuang Zhang, Shuling Liu, Beida Ren, Zhenhan Li, Qinguo | Beijing University of Chinese Medicine                                                                                                           |                                              | Pubmed, PharmMapper  | OMIM, GAD, TTD, Gene ontology, KEGG       | [111] |

|                                                                                                                            |      |                                                                                                                                                                                      |                                                                                                                     |                                                                                     |                         |                                    |       |
|----------------------------------------------------------------------------------------------------------------------------|------|--------------------------------------------------------------------------------------------------------------------------------------------------------------------------------------|---------------------------------------------------------------------------------------------------------------------|-------------------------------------------------------------------------------------|-------------------------|------------------------------------|-------|
|                                                                                                                            |      | Wang, Xueqian Wang                                                                                                                                                                   |                                                                                                                     |                                                                                     |                         |                                    |       |
| Systems pharmacology analysis of synergy of TCM; an example using saffron formula                                          | 2018 | Jianling Liu, Jingjing Liu, Fengxia Shen, Zonghui Qin, Meng Jiang, Jinglin Zhu, Zhenzhong Wang, Jun Zhou, Yingxue Fu, Xuetong Chen, Chao Huang, Wei Xiao, Chunli Zheng, Yonghua Wang | Northwest A&F University, Northwest University, Jiangsu Kanion Pharmaceutical Corporation                           | TCMSP                                                                               | TCMSP, WES              | PharmGkb, TTD, Gene ontology, KEGG | [112] |
| Systems pharmacology approach to investigate the molecular mechanisms of herb <i>Rhodiola rosea</i> L. radix               | 2018 | Wenjuan Zhang, Ying Huai, Zhiping Miao, Chu Chen, Mohamed Shahen, Siddiq Ur Rahman, Mahmoud Alagawany, Mahmoud E. Abd El-Hack, Heping Zhao, Aironq Qian                              | Xi'an JiaoTong University College of Medicine, Tanta University, Northwest A&F University, Zagazig University       | Chinese Academy of Sciences Chemistry database, Chinese Herbal Drug Database, TCMSP | TCMSP                   | Gene ontology, KEGG                | [113] |
| Systems pharmacology based strategy for Q-markers discovery of HuangQin decoction to attenuate intestinal damage           | 2018 | Xiaomin Dai, Dongni Cui, Jing Wang, Wei Zhang, Zunjian Zhang, Fengguo Xu                                                                                                             | China Pharmaceutical University, Shaanxi University of Chinese Medicine, Macau University of Science and Technology | TCMSP, TCMID                                                                        | TCMSP, STITCH, Drugbank | .                                  | [114] |
| Systems Pharmacology Dissection of Traditional Chinese Medicine Wen-Dan Decoction for Treatment of Cardiovascular Diseases | 2018 | Taohua Lan, Lulu Zhang, Yonghua Wang, Huanlin Wu, Danping Xu                                                                                                                         | Guangzhou University of Chinese Medicine, Northwest A&F University, Beijing University of Chinese Medicine          | TCMSP                                                                               | TCMSP                   | Gene ontology                      | [115] |

|                                                                                                                                               |      |                                                                                                                    |                                                                                                                                               |       |            |                                        |       |
|-----------------------------------------------------------------------------------------------------------------------------------------------|------|--------------------------------------------------------------------------------------------------------------------|-----------------------------------------------------------------------------------------------------------------------------------------------|-------|------------|----------------------------------------|-------|
| Systems pharmacology uncover the mechanism of anti-non-small cell lung cancer for Hedyotis diffusa Willd                                      | 2018 | Xing Su, Yueping Li, Meng Jiang, Jinglin Zhu, Chunli Zheng, Xuetong Chen, Jun Zhou, Yan Li, Wei Xiao, Yonghua Wang | Shihezi University, Northwest University, Northwest A&F University, Jiangsu Kanion Parmaceutical Corporation, Dalian University of Technology | TCMSP | TCMSP, WES | Gene ontology, KEGG                    | [116] |
| Systems pharmacology-based exploration reveals mechanisms of anti-steatotic effects of Jiang Zhi Granule on non-alcoholic fatty liver disease | 2018 | Yiyuan Zheng, Miao Wang, Peiyong Zheng, Xudong Tang, Guang Ji                                                      | Shanghai University of Traditional Chinese Medicine, Xiyuan Hospital of China Academy of Chinese Medical Sciences                             | TCMSP | TCMSP      | OMIM, TTD, GeneCards                   | [117] |
| Molecular targets of Chinese herbs: a clinical study of metastatic colorectal cancer based on network pharmacology.                           | 2018 | Hongxu Zhu, Jian Hao, Yangyang Niu, Dan Liu, Dan Chen, Xiongzhi Wu                                                 | Tianjin Medical University                                                                                                                    | TCMSP | TCMSP      | .                                      | [118] |
| Screening and analysis of key active constituents in Guanxinshutong capsule using mass spectrum and integrative network pharmacology.         | 2018 | Feng Liu, Xia Du, PeiRong Liu, YuHong Sun, YanMin Zhang                                                            | Xian Jiaotong University, Shanxi Academy of Traditionnal Chinese Medicine, Northwest University                                               | LC-MS | CSDT       | KEGG                                   | [119] |
| Systems pharmacology dissection of the anti-stroke mechanism for the Chinese traditional medicine Xing-Nao-Jing.                              | 2018 | Yuhua Chen, Yue Sun, Wende Li, Hong Wei, Tianlin Long, Hua Li, Quanhua Xu, Wei Liu                                 | Peihua University, PLA Army General Hospital, Shaanxi Fourth People's Hospital, Bijie First People's Hospital                                 | TCMSP | TCMSP, SEA | TTD, PharmGkb, DisGeNET, Gene ontology | [120] |

|                                                                                                                                                               |      |                                                                                                                                 |                                                                                                               |                                   |                          |                                                         |       |
|---------------------------------------------------------------------------------------------------------------------------------------------------------------|------|---------------------------------------------------------------------------------------------------------------------------------|---------------------------------------------------------------------------------------------------------------|-----------------------------------|--------------------------|---------------------------------------------------------|-------|
| A Computational Systems Pharmacology Approach to Investigate Molecular Mechanisms of Herbal Formula Tian-Ma-Gou-Teng-Yin for Treatment of Alzheimer's Disease | 2018 | Tianduanyi Wang, Zengrui Wu, Lixia Sun, Weihua Li, Guixia Liu, Yun Tang                                                         | East China University of Science and Technology                                                               | TCMSP, TCMID, TCM Database@taiwan | bSDTNBI                  | HuGE, KEGG disease, OMIM, PharmGkb, KEGG, Gene ontology | [121] |
| A Network Pharmacology Analysis to Explore the Effect of Astragali Radix-Radix Angelica Sinensis on Traumatic Brain Injury                                    | 2018 | Genggeng Xie, Weijun Peng, Pengfei Li, Zian Xia, Yuanyuan Zhong, Feng He, Yimingaji Tulake, Dandan Feng, Yang Wang, Zhihua Xing | Central South University, Xinjiang Production and Construction Corps Third Division Hospital                  | TCMSP                             | TCMSP, Literature mining | KEGG, Gene ontology, OMIM, TTD,                         | [122] |
| A network pharmacology approach to explore the mechanisms of Erxian decoction in polycystic ovary syndrome                                                    | 2018 | Lihong Liu, Bo Du, Haiying Zhang, Xiaofei Guo, Zheng Zhou, Aihui Xiu, Chang Liu, Shiyu Su, Hao Ai                               | Jinzhou Medical University                                                                                    | TCMSP                             | STITCH                   | NCBI Gene database, Gene ontology, KEGG                 | [123] |
| A New Strategy to Uncover the Anticancer Mechanism of Chinese Compound Formula by Integrating Systems Pharmacology and Bioinformatics                         | 2018 | Yifei Dai, Liang Sun, Weijie Qiang                                                                                              | China Academy of Chinese Medical Sciences, The China Institute for History of Medicine and Medical Literature | TCMSP, TCMID, TCM Database@Taiwan | TCMSP                    | KEGG, Drugbank                                          | [124] |
| Integrating Network Pharmacology and Metabolomics Study on Anti-rheumatic Mechanisms and Antagonistic Effects                                                 | 2018 | Jian Zuo, Xin Wang, Yang Liu, Jing Ye, Qingfei Liu, Yan Li, Shao Li                                                             | Wannan Medical College, Tsinghua University                                                                   | Literature mining                 | drugCIPHER               | Gene ontology, KEGG                                     | [125] |

|                                                                                                                                                                       |      |                                                                                                                   |                                                                                                                 |                                                                                             |                                        |                               |       |
|-----------------------------------------------------------------------------------------------------------------------------------------------------------------------|------|-------------------------------------------------------------------------------------------------------------------|-----------------------------------------------------------------------------------------------------------------|---------------------------------------------------------------------------------------------|----------------------------------------|-------------------------------|-------|
| Against Methotrexate-Induced Toxicity of Qing-Luo-Yin                                                                                                                 |      |                                                                                                                   |                                                                                                                 |                                                                                             |                                        |                               |       |
| Identification of Pharmacokinetic Markers for Guanxin Danshen Drop Pills in Rats by Combination of Pharmacokinetics, Systems Pharmacology, and Pharmacodynamic Assays | 2018 | Hong Yao, Xiaomei Huang, Yunjiao Xie, Xuliang Huang, Yijun Ruan, Xinhua Lin, Liying Huang, Peiying Shi            | Fujian Medical University, Fujian Agriculture and Forestry University                                           | HPLC                                                                                        | PharmMapper                            |                               | [126] |
| Anti-inflammatory effects of Zhishi and Zhiqiao revealed by network pharmacology integrated with molecular mechanism and metabolomics studies                         | 2018 | Siyu Zhao, Zhenli Liu, Menglei Wang, Dan He, Linlin Liu, Yisong Shu, Zhiqian Song, Hui Li, Yuanyan Liu, Aiping Lu | Beijing University of Chinese Medicine, China Academy of Chinese Medical Sciences, Hong Kong Baptist University | RRLC-QqQ-MS                                                                                 | PubChem, Drugbank, String, PharmMapper | KEGG, HMDB                    | [127] |
| Bioinformatics Based Therapeutic Effects of Sinomenium Acutum                                                                                                         | 2018 | Yuyan Li, Guang Zheng, Liang Liu                                                                                  | Macau University of Science and Technology, Shenzhen Traditional Chinese Medicine Hospital, Lanzhou University  | Chinese Pharmacopoeia, Chinese Medicine Dictionaries, Traditional Chinese Medicine Database | PubChem                                | IPA, IPKB                     | [128] |
| Effects and mechanisms of Danshen-Shanzha herb-pair for atherosclerosis treatment using network pharmacology and                                                      | 2018 | Jianyong Zhang, Rixin Liang, Lan Wang, Bin Yang                                                                   | China Academy of Chinese Medical Sciences                                                                       | HPLC                                                                                        | PharmMapper                            | TTD, PharmGkb, Drugbank, KEGG | [129] |

|                                                                                                                                                                                                                          |      |                                                                                                                                                                 |                                                                                                                       |      |             |                     |       |
|--------------------------------------------------------------------------------------------------------------------------------------------------------------------------------------------------------------------------|------|-----------------------------------------------------------------------------------------------------------------------------------------------------------------|-----------------------------------------------------------------------------------------------------------------------|------|-------------|---------------------|-------|
| experimental pharmacology                                                                                                                                                                                                |      |                                                                                                                                                                 |                                                                                                                       |      |             |                     |       |
| Effects of Qijian mixture on type 2 diabetes assessed by metabonomics, gut microbiota and network pharmacology                                                                                                           | 2018 | Kuo Gao, Ran Yang, Jian Zhang, Zhiyong Wang, Caixia Jia, Feilong Zhang, Shaojing Li, Jinping Wang, Ghulam Murtaza, Hua Xie, Huihui Zhao, Wei Wang, Jianxin Chen | Beijing University of Chinese Medicine, China Academy of Chinese Medical Sciences, FengNing Chinese Medicine Hospital | UPLC | STITCH      | KEGG                | [130] |
| Integrated Network Pharmacology and Metabolomics Analysis of the Therapeutic Effects of Zi Dian Fang on Immune Thrombocytopenic Purpura                                                                                  | 2018 | Yubo Li, Yamei Li, Wenliang Lu, Hongbin Li, Yuming Wang, Houmin Luo, Yuanyuan Wu, Wenying Dong, Gang Bai, Yanjun Zhang                                          | Tianjin University of Traditional Chinese Medicine, Tasly Pharmaceutical Group, Nankai University                     | UPLC | PharmMapper | KEGG                | [131] |
| Integration of transcriptomics, proteomics, metabolomics and systems pharmacology data to reveal the therapeutic mechanism underlying Chinese herbal Bufe Yishen formula for the treatment of chronic obstructive pulmon | 2018 | Peng Zhao, Jiansheng Li, Liping Yang, Ya Li, Yange Tian, Suyun Li                                                                                               | Henan University of Chinese Medicine                                                                                  | HPLC | Microarray  | KEGG, Gene ontology | [132] |
| Multifactorial Modes of Action of Arsenic Trioxide in Cancer Cells as Analyzed by Classical and Network                                                                                                                  | 2018 | Mona Dawood, Sami Hamdoun, Thomas Efferth                                                                                                                       | Johannes Gutenberg University                                                                                         | .    | Microarray  | IPA                 | [133] |



| Pharmacology                                                                                                                                                      |      |                                                                                                         |                                                                                                  |              |                       |                      |       |
|-------------------------------------------------------------------------------------------------------------------------------------------------------------------|------|---------------------------------------------------------------------------------------------------------|--------------------------------------------------------------------------------------------------|--------------|-----------------------|----------------------|-------|
| Network pharmacology study reveals energy metabolism and apoptosis pathways-mediated cardioprotective effects of Shenqi Fuzheng                                   | 2018 | Jie Liao, Cui Hao, Wenhua Huang, Xin Shao, Yangang Song, Liangfeng Liu, Ni Ai, Xiaohui Fan              | Zhejiang University, Livzon Pharmaceutical Group Inc.                                            |              | Microarray            | KEGG                 | [134] |
| Network Pharmacology to Unveil the Biological Basis of Health-Strengthening Herbal Medicine in Cancer Treatment                                                   | 2018 | Jiahui Zheng, Min Wu, Haiyan Wang, Shasha Li, Xin Wang, Yan Li, Dong Wang, Shao Li                      | Tsinghua University, Chinese Academy of Medical Sciences, Peking Union Medical College           |              | drugCIPHER            | KEGG, OMIM           | [135] |
| Network pharmacology-based prediction of the active ingredients, potential targets, and signaling pathways in compound Lian-Ge granules for treatment of diabetes | 2018 | Jintao Xue, Yongli Shi, Chunyan Li, Huijie Song                                                         | Xinxiang Medical University                                                                      | UPLC         | PharmMapper, Drugbank | KEGG, Gene ontology  | [136] |
| Network pharmacology-based strategy to investigate pharmacological mechanisms of Zuojinwan for treatment of gastritis                                             | 2018 | Guohua Yu, Wubin Wang, Xu Wang, Meng Xu, Lili Zhang, Lei Ding, Rui Guo, Yuanyuan Shi                    | Beijing University of Chinese Medicine                                                           | TCMSP        | TCMSP, STITCH         | Drugbank, OMIM, KEGG | [137] |
| Network Pharmacology-Based Validation of Caveolin-1 as a Key Mediator of Ai Du Qing Inhibition of Drug                                                            | 2018 | Neng Wang, Bowen Yang, Xiaotong Zhang, Shengqi Wang, Yifeng Zheng, Xiong Li, Shan Liu, Hao Pan, Yingwei | Guangzhou University of Chinese Medicine, The Second Affiliated Hospital of Guangzhou University | TCMSP, TCMID | Microarray            | Gene ontology, KEGG  | [138] |

|                                                                                                                                                                 |      |                                                                                                                                                           |                                                                                                                                |       |                 |                                   |       |  |
|-----------------------------------------------------------------------------------------------------------------------------------------------------------------|------|-----------------------------------------------------------------------------------------------------------------------------------------------------------|--------------------------------------------------------------------------------------------------------------------------------|-------|-----------------|-----------------------------------|-------|--|
| Resistance in Breast Cancer                                                                                                                                     |      | Li, Zhujuan Huang, Fengxue Zhang, Zhiyu Wang                                                                                                              | of Chinese Medicine, Guangzhou University of Chinese Medicine                                                                  |       |                 |                                   |       |  |
| Systems pharmacology approach reveals the antiinflammatory effects of Ampelopsis grossedentata on dextran sodium sulfate-induced colitis                        | 2018 | Youlan Chen, Yali Zhang, Yancheng Dai, Zhipeng Tang                                                                                                       | Shanghai University of Traditional Chinese Medicine                                                                            | TCMSP | TCMSP           | Genetic Association database, TTD | [139] |  |
| Systems Pharmacology-Based Approach of Connecting Disease Genes in Genome-Wide Association Studies with Traditional Chinese Medicine                            | 2018 | Jihye Kim, Minjae Yoo, Jimin Shin, Hyunmin Kim, Jaewoo Kang, Aik Choon Tan                                                                                | University of Colorado Anschutz Medical Campus, Korea University                                                               |       | Microarray      | GWAS                              | [140] |  |
| Systems pharmacology-based investigation of Sanwei Ganjiang Prescription; related mechanisms in liver injury                                                    | 2018 | Yunxia Luo, Xinyue Wang, Yujie Huang, Shuhuan Fang, Jun Wu, Yongbin Zhang, Tianqin Xiong, Cong Yang, Jiangang Shen, Chuanlan Sang, Qi Wang, Jiansong Fang | Guangzhou University of Chinese Medicine, Sun Yat-sen University, The University of Hong Kong                                  | TCMSP | bSDTNBI         | Gene ontology, KEGG               | [141] |  |
| Uncovering the anticancer mechanism of Compound Kushen Injection against HCC by integrating quantitative analysis, network analysis and experimental validation | 2018 | Li Gao, Kexin Wang, Yuzhi Zhou, Jiansong Fang, Xuemei Qin, Guanhua Du                                                                                     | Shanxi University, Guangzhou University of Chinese Medicine, Chinese Academy of Medical Sciences, Peking Union Medical College | UPLC  | ChemMapper, HIT | OncoDB.HCC, Liverome, KEGG,       | [142] |  |

|                                                                                                                                                                                         |      |                                                                                                                                                |                                                                                      |                       |             |               |       |
|-----------------------------------------------------------------------------------------------------------------------------------------------------------------------------------------|------|------------------------------------------------------------------------------------------------------------------------------------------------|--------------------------------------------------------------------------------------|-----------------------|-------------|---------------|-------|
| Unveiling Active Constituents and Potential Targets Related to the Hematinic Effect of Steamed Panax notoginseng Using Network Pharmacology Coupled With Multivariate Data Analyses     | 2018 | Yin Xiong, Yupiao Hu, Lijuan Chen, Zejun Zhang, Yiming Zhang, Ming Niu, Xiuming Cui                                                            | Kunming University of Science and Technology, 302 Military Hospital of China         | HPLC                  | PharmMapper | OMIM, KEGG    | [143] |
| Discovery of the mechanisms and major bioactive compounds responsible for the protective effects of Gualou Xiebai Decoction on coronary heart disease by network pharmacology analysis. | 2018 | Chong Li, WeiYang Zhang, Yang Yu, ChunSong Cheng, JingYan Han, XinSheng Yao, Hua Zhou                                                          | Macau University of Science and Technology, Guangzhou University of Chinese Medicine | UPLC                  | PharmMapper | Drugbank, TTD | [144] |
| TCMAnalyzer: A Chemo- and Bioinformatics Web Service for Analyzing Traditional Chinese Medicine.                                                                                        | 2018 | Zhihong Liu, Jiewen Du, Xin Yan, Jiali Zhong, Lu Cui, Jinyuan Lin, Lizhu Zeng, Peng Ding, Chen Pin, Xinxin Zhou, Huihao Zhou, Qiong Gu, Jun Xu | Sun Yat-sen University, Guangzhou University of Chinese Medicine                     | Chinese Pharmacopoeia | ChEMBL      | TTD           | [145] |
| Uncovering the Mechanisms of Chinese Herbal Medicine (MaZiRenWan) for Functional Constipation by Focused Network                                                                        | 2018 | Tao Huang, Ziwan Ning, Dongdong Hu, Man Zhang, Ling Zhao, Chengyuan Lin, Linda-L.D. Zhong, Zhijun Yang, Hongxi Xu, Zhaoxiang Bian              | Hong Kong Baptist University, Shanghai University of Traditional Chinese Medicine    | BindingDB             | MOST method | Pubmed        | [146] |

---

Pharmacology Approach.

---

|                                                                                                                                                                     |      |                                                                                                                   |                                                          |                             |                             |                          |       |
|---------------------------------------------------------------------------------------------------------------------------------------------------------------------|------|-------------------------------------------------------------------------------------------------------------------|----------------------------------------------------------|-----------------------------|-----------------------------|--------------------------|-------|
| Network pharmacology-based identification of major component of <i>Angelica sinensis</i> and its action mechanism for the treatment of acute myocardial infarction. | 2018 | Xiaowei Niu, Jingjing Zhang, Jinrong Ni, Runqing Wang, Weiqiang Zhang, Shaobo Sun, Yu Peng, Ming Bai, Zheng Zhang | Lanzhou University, Gansu University of Chinese Medicine | TCMSP, TCM-mesh, BATMAN-TCM | TCMSP, TCM-mesh, BATMAN-TCM | TTD, GAD, PharmGkb, OMIM | [147] |
|---------------------------------------------------------------------------------------------------------------------------------------------------------------------|------|-------------------------------------------------------------------------------------------------------------------|----------------------------------------------------------|-----------------------------|-----------------------------|--------------------------|-------|

---

Supplementary Table 2. Providing information and their types of methods employed in THM-NP studies

| Name                                                          | Herb-Compound Network Construction | Compound-Target Network Construction |                             |                       |        | Target Interpretation |         |         |
|---------------------------------------------------------------|------------------------------------|--------------------------------------|-----------------------------|-----------------------|--------|-----------------------|---------|---------|
|                                                               |                                    | Chemogenomic Approach                | Docking Simulation Approach | Ligand-Based Approach | Others | Biological Process    | Pathway | Disease |
| AlzhCPI                                                       |                                    |                                      |                             | ○                     |        |                       |         |         |
| BATMAN-TCM                                                    | ○                                  | ○                                    |                             |                       |        | ○                     | ○       |         |
| BindingDB                                                     | ○                                  |                                      |                             |                       |        |                       |         |         |
| Bio database                                                  |                                    |                                      |                             |                       |        |                       | ○       |         |
| bSDTNBI                                                       |                                    | ○                                    |                             |                       |        |                       |         |         |
| CADGene                                                       |                                    |                                      |                             |                       |        |                       | ○       |         |
| CHDD                                                          | ○                                  |                                      |                             |                       |        |                       |         |         |
| ChEMBL                                                        |                                    |                                      |                             |                       | ○      |                       |         |         |
| Chemistry database of Shanghai Institute of Organic Chemistry | ○                                  |                                      |                             |                       |        |                       |         |         |
| ChemMapper                                                    |                                    |                                      |                             | ○                     |        |                       |         |         |
| Chinese Academy of Science                                    | ○                                  |                                      |                             |                       |        |                       |         |         |
| Chinese Academy of Sciences Chemistry                         | ○                                  |                                      |                             |                       |        |                       |         |         |
| Chinese Herbal Drug Database                                  | ○                                  |                                      |                             |                       |        |                       |         |         |
| Chinese Medicine Dictionaries                                 | ○                                  |                                      |                             |                       |        |                       |         |         |
| Chinese Natural Product Database                              | ○                                  |                                      |                             |                       |        |                       |         |         |
| Chinese Pharmacopoeia                                         | ○                                  |                                      |                             |                       |        |                       |         |         |

|                                                                       |   |   |   |   |
|-----------------------------------------------------------------------|---|---|---|---|
| CNKI                                                                  |   |   | ○ | ○ |
| Comparative Toxicogenomics Database                                   |   |   | ○ |   |
| Comprehensive natural products in TCM                                 | ○ |   |   |   |
| Cross-species drug-target model (CSDT)                                |   |   | ○ |   |
| DisGeNET                                                              |   |   |   | ○ |
| Dr. Duke's phytochemical and ethnobotanical database                  | ○ |   |   |   |
| Drugbank                                                              |   |   | ○ | ○ |
| drugCIPHER                                                            |   | ○ |   |   |
| FDA orange book                                                       |   |   |   | ○ |
| GAD                                                                   |   |   |   | ○ |
| Gene ontology                                                         |   |   |   | ○ |
| GeneCards                                                             |   |   |   | ○ |
| Genetic Association database                                          |   |   |   | ○ |
| GWAS                                                                  |   |   |   | ○ |
| Handbook of the Chemical Constituents in Chinese Herb Original Plants | ○ |   |   |   |
| HerBiomap                                                             | ○ |   |   |   |
| HIT                                                                   |   |   | ○ | ○ |
| HMDB                                                                  |   |   |   | ○ |
| HPLC                                                                  | ○ |   |   |   |
| HuGE                                                                  |   |   |   | ○ |
| IPA                                                                   |   |   |   | ○ |
| IPKB                                                                  |   |   |   | ○ |

|                                                 |   |   |   |
|-------------------------------------------------|---|---|---|
| KEGG                                            |   |   | ○ |
| KEGG disease                                    |   |   | ○ |
| Korean traditional knowledge portal database    | ○ |   |   |
| LC-MS                                           | ○ |   |   |
| Literature mining                               | ○ | ○ | ○ |
| Liverome                                        |   |   | ○ |
| MalaCards                                       |   |   | ○ |
| Medchem                                         |   | ○ |   |
| Medicinal Plants Database                       | ○ |   |   |
| Metadrug                                        |   | ○ |   |
| Microarray                                      |   | ○ |   |
| Molecular docking                               |   | ○ |   |
| Molecule Annotation System                      |   |   | ○ |
| MOST method                                     |   | ○ |   |
| NCBI Gene database                              |   |   | ○ |
| NMR                                             | ○ |   |   |
| OMIM                                            |   |   | ○ |
| OncoDB.HCC                                      |   |   | ○ |
| Organchem                                       | ○ |   |   |
| PANTHER                                         |   |   | ○ |
| Pharmacopoeia of the People's Republic of China | ○ |   |   |
| PharmGkb                                        |   |   | ○ |
| PharmMapper                                     |   | ○ |   |
| Potential drug target database                  |   |   | ○ |
| Potential Drug Target Database                  |   |   | ○ |

|                                       |   |   |   |   |
|---------------------------------------|---|---|---|---|
| PubChem                               |   |   | ○ | ○ |
| PubMed                                |   |   | ○ | ○ |
| QSAR                                  |   |   | ○ |   |
| RCSB PDB                              |   |   |   | ○ |
| Reaxys                                | ○ |   |   |   |
| RNA-seq                               |   |   | ○ |   |
| RRLC-QqQ-MS                           | ○ |   |   |   |
| SciFinder                             | ○ |   | ○ |   |
| SEA                                   |   |   | ○ |   |
| STITCH                                |   |   | ○ |   |
| String                                |   |   | ○ |   |
| SwissTargetPrediction                 |   |   | ○ |   |
| T2D@ZJU                               |   |   |   | ○ |
| T2D-Db                                |   |   |   | ○ |
| Tanimoto coefficient                  |   |   | ○ |   |
| TarNet                                |   |   | ○ |   |
| TCM Database@taiwan                   | ○ |   |   |   |
| TCMGeneDIT                            | ○ |   | ○ |   |
| TCMID                                 | ○ |   | ○ |   |
| TCM-ID                                | ○ |   |   |   |
| TCM-mesh                              |   | ○ |   | ○ |
| TCMN                                  | ○ |   |   |   |
| TCM-PTD                               | ○ |   | ○ |   |
| TCMSP                                 | ○ | ○ |   | ○ |
| T-HOD                                 |   |   |   | ○ |
| TimTec plant extracts database        | ○ |   |   |   |
| Traditional Chinese Medicine Database | ○ |   |   |   |



|                   |   |   |   |
|-------------------|---|---|---|
| TTD               |   | ○ | ○ |
| UPLC              | ○ |   |   |
| UTRI              |   |   | ○ |
| VIP database      |   |   | ○ |
| Wangfang Database |   |   | ○ |
| WES               |   | ○ |   |

## References

1. Gu, J.; Zhang, H.; Chen, L.; Xu, S.; Yuan, G.; Xu, X. Drug-target network and polypharmacology studies of a Traditional Chinese Medicine for type II diabetes mellitus. *Comput. Biol. Chem.* **2011**.
2. Ye, H.Z.; Zheng, C.S.; Xu, X.J.; Wu, M.X.; Liu, X.X. Potential synergistic and multitarget effect of herbal pair Chuanxiong Rhizome-Paeonia Albiflora Pall on osteoarthritis disease: A computational pharmacology approach. *Chin. J. Integr. Med.* **2011**.
3. Li, X.; Xu, X.; Wang, J.; Yu, H.; Wang, X.; Yang, H.; Xu, H.; Tang, S.; Li, Y.; Yang, L.; et al. A System-Level Investigation into the Mechanisms of Chinese Traditional Medicine: Compound Danshen Formula for Cardiovascular Disease Treatment. *PLoS One* **2012**.
4. Li, B.; Xu, X.; Wang, X.; Yu, H.; Li, X.; Tao, W.; Wang, Y.; Yang, L. A systems biology approach to understanding the mechanisms of action of chinese herbs for treatment of cardiovascular disease. *Int. J. Mol. Sci.* **2012**.
5. Wang, X.; Xu, X.; Tao, W.; Li, Y.; Wang, Y.; Yang, L. A Systems Biology Approach to Uncovering Pharmacological Synergy in Herbal Medicines with Applications to Cardiovascular Disease. *Evidence-Based Complement. Altern. Med.* **2012**.
6. Ye, L.; He, Y.; Ye, H.; Liu, X.P.; Yang, L.L.; Cao, Z.W.; Tang, K.L. Pathway-pathway network-based study of the therapeutic mechanisms by which salvianolic acid B regulates cardiovascular diseases. *Chinese Sci. Bull.* **2012**.
7. Zhao, J.; Yang, P.; Li, F.; Tao, L.; Ding, H.; Rui, Y.; Cao, Z.; Zhang, W. Therapeutic Effects of Astragaloside IV on Myocardial Injuries: Multi-Target Identification and Network Analysis. *PLoS One* **2012**.
8. Jiang, M.; Lu, C.; Chen, G.; Xiao, C.; Zha, Q.; Niu, X.; Chen, S.; Lu, A. Understanding the Molecular Mechanism of Interventions in Treating Rheumatoid Arthritis Patients with Corresponding Traditional Chinese Medicine Patterns Based on Bioinformatics Approach. *Evidence-Based Complement. Altern. Med.* **2012**.
9. Yao, Y.; Zhang, X.; Wang, Z.; Zheng, C.; Li, P.; Huang, C.; Tao, W.; Xiao, W.; Wang, Y.; Huang, L.; et al. Deciphering the combination principles of Traditional Chinese Medicine from a systems pharmacology perspective based on Ma-huang Decoction. *J. Ethnopharmacol.* **2013**.
10. Tao, W.; Xu, X.; Wang, X.; Li, B.; Wang, Y.; Li, Y.; Yang, L. Network pharmacology-based prediction of the active ingredients and potential targets of Chinese herbal Radix Curcumae formula for application to cardiovascular disease. *J. Ethnopharmacol.* **2013**.
11. Liu, H.; Wang, J.; Zhou, W.; Wang, Y.; Yang, L. Systems approaches and polypharmacology for drug discovery from herbal medicines: An example using licorice. *J. Ethnopharmacol.* **2013**.
12. Wang, X.; Xu, X.; Li, Y.; Li, X.; Tao, W.; Li, B.; Wang, Y.; Yang, L. Systems pharmacology uncovers Janus functions of botanical drugs: Activation of host defense system and inhibition of influenza virus replication. *Integr. Biol. (United Kingdom)* **2013**.

13. Pei, L.; Bao, Y.; Liu, S.; Zheng, J.; Chen, X. Material Basis of Chinese Herbal Formulas Explored by Combining Pharmacokinetics with Network Pharmacology. *PLoS One* **2013**.
14. Wu, L.; Wang, Y.; Nie, J.; Fan, X.; Cheng, Y. A Network Pharmacology Approach to Evaluating the Efficacy of Chinese Medicine Using Genome-Wide Transcriptional Expression Data. *Evidence-Based Complement. Altern. Med.* **2013**.
15. Zhang, Y.; Wang, D.; Tan, S.; Xu, H.; Liu, C.; Lin, N. A Systems Biology-Based Investigation into the Pharmacological Mechanisms of Wu Tou Tang Acting on Rheumatoid Arthritis by Integrating Network Analysis. *Evidence-Based Complement. Altern. Med.* **2013**.
16. Zhang, B.; Wang, X.; Li, S. An Integrative Platform of TCM Network Pharmacology and Its Application on a Herbal Formula, Qing-Luo-Yin . *Evidence-Based Complement. Altern. Med.* **2013**.
17. Zheng, C.S.; Xu, X.J.; Ye, H.Z.; Wu, G.W.; Li, X.H.; Xu, H.F.; Liu, X.X. Network pharmacology-based prediction of the multi-target capabilities of the compounds in Taohong Siwu decoction, and their application in osteoarthritis. *Exp. Ther. Med.* **2013**.
18. Dai, W.; Chen, J.; Lu, P.; Gao, Y.; Chen, L.; Liu, X.; Song, J.; Xu, H.; Chen, D.; Yang, Y.; et al. Pathway Pattern-based prediction of active drug components and gene targets from H1N1 influenza's treatment with maxingshigan-yinqiaosan formula. *Mol. Biosyst.* **2013**.
19. Ma, S.; Feng, C.; Zhang, X.; Dai, G.; Li, C.; Cheng, X.; Liu, P.; Ju, W.; Yu, H. The multi-target capabilities of the compounds in a TCM used to treat sepsis and their in silico pharmacology. *Complement. Ther. Med.* **2013**.
20. Sun, Y.; Zhu, R.; Ye, H.; Tang, K.; Zhao, J.; Chen, Y.; Liu, Q.; Cao, Z. Towards a bioinformatics analysis of anti-alzheimer's herbalmedicines from a target network perspective. *Brief. Bioinform.* **2013**.
21. Li, Y.; Han, C.; Wang, J.; Xiao, W.; Wang, Z.; Zhang, J.; Yang, Y.; Zhang, S.; Ai, C. Investigation into the mechanism of *Eucommia ulmoides* Oliv. based on a systems pharmacology approach. *J. Ethnopharmacol.* **2014**.
22. Li, B.; Tao, W.; Zheng, C.; Shar, P.A.; Huang, C.; Fu, Y.; Wang, Y. Systems pharmacology-based approach for dissecting the addition and subtraction theory of traditional Chinese medicine: An example using Xiao-Chaihu-Decoction and Da-Chaihu-Decoction. *Comput. Biol. Med.* **2014**.
23. Shi, S.H.; Cai, Y.P.; Cai, X.J.; Zheng, X.Y.; Cao, D.S.; Ye, F.Q.; Xiang, Z. A network pharmacology approach to understanding the mechanisms of action of traditional medicine: Bushenhuoxue formula for treatment of chronic kidney disease. *PLoS One* **2014**.
24. Liang, X.; Li, H.; Li, S. A novel network pharmacology approach to analyse traditional herbal formulae: The Liu-Wei-Di-Huang pill as a case study. *Mol. Biosyst.* **2014**.
25. Xu, H.; Zhang, Y.; Lei, Y.; Gao, X.; Zhai, H.; Lin, N.; Tang, S.; Liang, R.; Ma, Y.; Li, D.; et al. A systems biology-based approach to uncovering the molecular mechanisms underlying the effects of dragon's blood tablet in colitis, involving the integration of chemical analysis, ADME prediction,

and network pharmacology. *PLoS One* **2014**.

26. Yang, H.; Zhang, W.; Huang, C.; Zhou, W.; Yao, Y.; Wang, Z.; Li, Y.; Xiao, W.; Wang, Y. A novel systems pharmacology model for herbal medicine injection: A case using reduning injection. *BMC Complement. Altern. Med.* **2014**.
27. Li, H.; Zhao, L.; Zhang, B.; Jiang, Y.; Wang, X.; Guo, Y.; Liu, H.; Li, S.; Tong, X. A Network Pharmacology Approach to Determine Active Compounds and Action Mechanisms of Ge-Gen-Qin-Lian Decoction for Treatment of Type 2 Diabetes. *Evidence-Based Complement. Altern. Med.* **2014**.
28. Li, X.; Wu, L.; Liu, W.; Jin, Y.; Chen, Q.; Wang, L.; Fan, X.; Li, Z.; Cheng, Y. A network pharmacology study of Chinese medicine QiShenYiQi to reveal its underlying multi-compound, multi-target, multi-pathway mode of action. *PLoS One* **2014**.
29. Gu, H.; Ma, L.; Ren, Y.; He, W.; Wang, Y.; Qiao, Y. Exploration of the mechanism of pattern-specific treatments in coronary heart disease with network pharmacology approach. *Comput. Biol. Med.* **2014**.
30. Wu, L.; Wang, Y.; Li, Z.; Zhang, B.; Cheng, Y.; Fan, X. Identifying roles of “ Jun-Chen-Zuo-Shi” component herbs of QiShenYiQi formula in treating acute myocardial ischemia by network pharmacology. *Chinese Med. (United Kingdom)* **2014**.
31. Sheng, S.; Wang, J.; Wang, L.; Liu, H.; Li, P.; Liu, M.; Long, C.; Xie, C.; Xie, X.; Su, W. Network pharmacology analyses of the antithrombotic pharmacological mechanism of Fufang Xueshuantong Capsule with experimental support using disseminated intravascular coagulation rats. *J. Ethnopharmacol.* **2014**.
32. Zhang, X.; Gu, J.; Cao, L.; Li, N.; Ma, Y.; Su, Z.; Ding, G.; Chen, L.; Xu, X.; Xiao, W. Network pharmacology study on the mechanism of traditional Chinese medicine for upper respiratory tract infection. *Mol. Biosyst.* **2014**.
33. Ru, J.; Li, P.; Wang, J.; Zhou, W.; Li, B.; Huang, C.; Li, P.; Guo, Z.; Tao, W.; Yang, Y.; et al. TCMSP: A database of systems pharmacology for drug discovery from herbal medicines. *J. Cheminform.* **2014**, 6, 1–6.
34. Zhao, F.; Guochun, L.; Yang, Y.; Shi, L.; Xu, L.; Yin, L. A network pharmacology approach to determine active ingredients and rationality of herb combinations of Modified-Simiaowan for treatment of gout. *J. Ethnopharmacol.* **2015**.
35. Luo, Y.; Wang, Q.; Zhang, Y. A systems pharmacology approach to decipher the mechanism of danggui-shaoyao-san decoction for the treatment of neurodegenerative diseases. *J. Ethnopharmacol.* **2016**.
36. Tang, F.; Tang, Q.; Tian, Y.; Fan, Q.; Huang, Y.; Tan, X. Network pharmacology-based prediction of the active ingredients and potential targets of Mahuang Fuzi Xixin decoction for application to allergic rhinitis. *J. Ethnopharmacol.* **2015**.
37. Wang, Y.; Zheng, C.; Huang, C.; Li, Y.; Chen, X.; Wu, Z.; Wang, Z.; Xiao, W.; Zhang, B. Systems Pharmacology Dissecting Holistic Medicine for

Treatment of Complex Diseases: An Example Using Cardiocerebrovascular Diseases Treated by TCM. *Evidence-Based Complement. Altern. Med.* **2015.**

38. Li, J.; Zhao, P.; Li, Y.; Tian, Y.; Wang, Y. Systems pharmacology-based dissection of mechanisms of Chinese medicinal formula Bufeiyishen as an effective treatment for chronic obstructive pulmonary disease. *Sci. Rep.* **2015.**
39. Xu, F.; Ding, Y.; Guo, Y.; Liu, B.; Kou, Z.; Xiao, W.; Zhu, J. Anti-osteoporosis effect of Epimedium via an estrogen-like mechanism based on a system-level approach. *J. Ethnopharmacol.* **2016.**
40. Jiang, X.; Lv, B.; Li, P.; Ma, X.; Wang, T.; Zhou, Q.; Wang, X.; Gao, X. Bioactivity-integrated UPLC/Q-TOF-MS of Danhong injection to identify NF- $\kappa$ B inhibitors and anti-inflammatory targets based on endothelial cell culture and network pharmacology. *J. Ethnopharmacol.* **2015.**
41. Xiang, Z.; Sun, H.; Cai, X.; Chen, D.; Zheng, X. The study on the material basis and the mechanism for anti-renal interstitial fibrosis efficacy of rhubarb through integration of metabolomics and network pharmacology. *Mol. Biosyst.* **2015.**
42. Zheng, C.S.; Fu, C.L.; Pan, C. Bin; Bao, H.J.; Chen, X.Q.; Ye, H.Z.; Ye, J.X.; Wu, G.W.; Li, X.H.; Xu, H.F.; et al. Deciphering the underlying mechanisms of Diesun Miaofang in traumatic injury from a systems pharmacology perspective. *Mol. Med. Rep.* **2015.**
43. Guo, Q.; Zhong, M.; Xu, H.; Mao, X.; Zhang, Y.; Lin, N. A Systems Biology Perspective on the Molecular Mechanisms Underlying the Therapeutic Effects of Buyang Huanwu Decoction on Ischemic Stroke. *Rejuvenation Res.* **2015.**
44. Huang, L.; Lv, Q.; Liu, F.; Shi, T.; Wen, C. A Systems Biology-Based Investigation into the Pharmacological Mechanisms of Sheng-ma-bie-jia-tang Acting on Systemic Lupus Erythematosus by Multi-Level Data Integration. *Sci. Rep.* **2015.**
45. Li, Y.; Li, R.; Ouyang, Z.; Li, S. Herb Network Analysis for a Famous TCM Doctor's Prescriptions on Treatment of Rheumatoid Arthritis. *Evidence-Based Complement. Altern. Med.* **2015.**
46. An, L.; Feng, F. Network Pharmacology-Based Antioxidant Effect Study of Zhi-Zi-Da-Huang Decoction for Alcoholic Liver Disease. *Evidence-Based Complement. Altern. Med.* **2015.**
47. Zhang, B.; Lu, C.; Bai, M.; He, X.; Tan, Y.; Bian, Y.; Xiao, C.; Zhang, G.; Lu, A.; Li, S. Tetramethylpyrazine identified by a network pharmacology approach ameliorates methotrexate-induced oxidative organ injury. *J. Ethnopharmacol.* **2015.**
48. Gao, L.; Wang, X.D.; Niu, Y.Y.; Duan, D.D.; Yang, X.; Hao, J.; Zhu, C.H.; Chen, D.; Wang, K.X.; Qin, X.M.; et al. Molecular targets of Chinese herbs: a clinical study of hepatoma based on network pharmacology. *Sci. Rep.* **2016.**
49. Pei, T.; Zheng, C.; Huang, C.; Chen, X.; Guo, Z.; Fu, Y.; Liu, J.; Wang, Y. Systematic understanding the mechanisms of vitiligo pathogenesis and its treatment by Qubaibabuqi formula. *J. Ethnopharmacol.* **2016.**

50. Zhang, W.; Tao, Q.; Guo, Z.; Fu, Y.; Chen, X.; Shar, P.A.; Shahen, M.; Zhu, J.; Xue, J.; Bai, Y.; et al. Systems Pharmacology Dissection of the Integrated Treatment for Cardiovascular and Gastrointestinal Disorders by Traditional Chinese Medicine. *Sci. Rep.* **2016**.
51. Zhou, W.; Wang, J.; Wu, Z.; Huang, C.; Lu, A.; Wang, Y. Systems pharmacology exploration of botanic drug pairs reveals the mechanism for treating different diseases. *Sci. Rep.* **2016**.
52. Liu, J.; Pei, T.; Mu, J.; Zheng, C.; Chen, X.; Huang, C.; Fu, Y.; Liang, Z.; Wang, Y. Systems Pharmacology Uncovers the Multiple Mechanisms of Xijiao Dihuang Decoction for the Treatment of Viral Hemorrhagic Fever. *Evidence-Based Complement. Altern. Med.* **2016**.
53. Liu, J.; Mu, J.; Zheng, C.; Chen, X.; Guo, Z.; Huang, C.; Fu, Y.; Tian, G.; Shang, H.; Wang, Y. Systems-Pharmacology Dissection of Traditional Chinese Medicine Compound Saffron Formula Reveals Multi-scale Treatment Strategy for Cardiovascular Diseases. *Sci. Rep.* **2016**.
54. Gao, L.; Hao, J.; Niu, Y.Y.; Tian, M.; Yang, X.; Zhu, C.H.; Ding, X.L.; Liu, X.H.; Zhang, H.R.; Liu, C.; et al. Network pharmacology dissection of multiscale mechanisms of herbal medicines in stage IV gastric adenocarcinoma treatment. *Med. (United States)* **2016**.
55. Shen, X.; Zhao, Z.; Luo, X.; Wang, H.; Hu, B.; Guo, Z. Systems Pharmacology Based Study of the Molecular Mechanism of SiNiSan Formula for Application in Nervous and Mental Diseases. *Evidence-Based Complement. Altern. Med.* **2016**.
56. Ke, Z.; Zhang, X.; Cao, Z.; Ding, Y.; Li, N.; Cao, L.; Wang, T.; Zhang, C.; Ding, G.; Wang, Z.; et al. Drug discovery of neurodegenerative disease through network pharmacology approach in herbs. *Biomed. Pharmacother.* **2016**.
57. Chen, L.; Lv, D.; Wang, D.; Chen, X.; Zhu, Z.; Cao, Y.; Chai, Y. A novel strategy of profiling the mechanism of herbal medicines by combining network pharmacology with plasma concentration determination and affinity constant measurement. *Mol. Biosyst.* **2016**.
58. Wang, C.H.; Zhong, Y.; Zhang, Y.; Liu, J.P.; Wang, Y.F.; Jia, W.N.; Wang, G.C.; Li, Z.; Zhu, Y.; Gao, X.M. A network analysis of the Chinese medicine Lianhua-Qingwen formula to identify its main effective components. *Mol. Biosyst.* **2016**.
59. Liu, H.; Zeng, L.; Yang, K.; Zhang, G. A network pharmacology approach to explore the pharmacological mechanism of xiaoyao powder on anovulatory infertility. *Evidence-based Complement. Altern. Med.* **2016**.
60. Liu, Z.; Guo, F.; Wang, Y.; Li, C.; Zhang, X.; Li, H.; Diao, L.; Gu, J.; Wang, W.; Li, D.; et al. BATMAN-TCM: A Bioinformatics Analysis Tool for Molecular mechANism of Traditional Chinese Medicine. *Sci. Rep.* **2016**, 6, 1–11.
61. Liao, J.; Wei, B.; Chen, H.; Liu, Y.M.; Wang, J. Bioinformatics investigation of therapeutic mechanisms of xuesaitong capsule treating ischemic cerebrovascular rat model with comparative transcriptome analysis. *Am. J. Transl. Res.* **2016**.
62. Liang, H.; Ruan, H.; Ouyang, Q.; Lai, L. Herb-target interaction network analysis helps to disclose molecular mechanism of traditional Chinese medicine. *Sci. Rep.* **2016**.

63. Qi, Q.; Li, R.; Li, H.Y.; Cao, Y.B.; Bai, M.; Fan, X.J.; Wang, S.Y.; Zhang, B.; Li, S. Identification of the anti-tumor activity and mechanisms of nuciferine through a network pharmacology approach. *Acta Pharmacol. Sin.* **2016**.
64. Zhou, W.; Yuan, W.F.; Chen, C.; Wang, S.M.; Liang, S.W. Study on material base and action mechanism of compound Danshen dripping pills for treatment of atherosclerosis based on modularity analysis. *J. Ethnopharmacol.* **2016**.
65. Sun, J.; Zhang, L.; He, Y.; Zhang, K.; Wu, L.; Fan, Y.; Xie, Z. To unveil the molecular mechanisms of Qi and blood through systems biology-based investigation into Si-Jun-Zi-Tang and Si-Wu-Tang formulae. *Sci. Rep.* **2016**.
66. Ma, X.; Lv, B.; Li, P.; Jiang, X.; Zhou, Q.; Wang, X.; Gao, X. Identification of “Multiple Components-Multiple Targets-Multiple Pathways” Associated with Naoxintong Capsule in the Treatment of Heart Diseases Using UPLC/Q-TOF-MS and Network Pharmacology. *Evidence-Based Complement. Altern. Med.* **2016**.
67. Guo, S.; Li, P.; Fu, B.; Chuo, W.; Gao, K.; Zhang, W.; Wang, J.; Chen, J.; Wang, W. Systems-biology dissection of mechanisms and chemical basis of herbal formula in treating chronic myocardial ischemia. *Pharmacol. Res.* **2016**.
68. Wang, J.; Cui, C.; Fu, L.; Xiao, Z.; Xie, N.; Liu, Y.; Yu, L.; Wang, H.; Luo, B. Genomic expression profiling and bioinformatics analysis on diabetic nephrology with ginsenoside Rg3. *Mol. Med. Rep.* **2016**.
69. Wang, J.; Li, Y.; Yang, Y.; Du, J.; Zhao, M.; Lin, F.; Zhang, S.; Wang, B. Systems Pharmacology Dissection of Multiscale Mechanisms of Action for Herbal Medicines in Treating Rheumatoid Arthritis. *Mol. Pharm.* **2017**.
70. Zeng, L.; Yang, K.; Ge, J. Uncovering the Pharmacological Mechanism of Astragalus Salvia Compound on Pregnancy-Induced Hypertension Syndrome by a Network Pharmacology Approach. *Sci. Rep.* **2017**.
71. Tao, L.-J.; Chen, W.-T.; Jing, L.; Ji, Q.; Ren, J.-L. A network pharmacology approach to establish the pharmacological mechanism of JiaWeiXianJiTang on inflammatory bowel disease. *Biomed. Reports* **2017**.
72. Tang, H.C.; Huang, H.J.; Lee, C.C.; Chen, C.Y.C. Network pharmacology-based approach of novel traditional Chinese medicine formula for treatment of acute skin inflammation in silico. *Comput. Biol. Chem.* **2017**.
73. Yu, G.; Zhang, Y.; Ren, W.; Dong, L.; Li, J.; Geng, Y.; Zhang, Y.; Li, D.; Xu, H.; Yang, H. Network pharmacology-based identification of key pharmacological pathways of yin–huang–qing–fei capsule acting on chronic bronchitis. *Int. J. COPD* **2016**.
74. Wang, D.; Gu, J.; Zhu, W.; Luo, F.; Chen, L.; Xu, X.; Lu, C. PDTTCM: a systems pharmacology platform of traditional Chinese medicine for psoriasis. *Ann. Med.* **2017**.
75. Kong, Q.; Ma, Y.; Yu, J.; Chen, X. Predicted molecular targets and pathways for germacrone, curdione, and furanodiene in the treatment of breast

cancer using a bioinformatics approach. *Sci. Rep.* **2017**.

76. Li, F.; Zhang, Y.; Zeng, D.; Xia, Y.; Fan, X.; Tan, Y.; Kou, J.; Yu, B. The combination of three components derived from sheng maisan protects myocardial ischemic diseases and inhibits oxidative stress via modulating MAPKs and JAK2-STAT3 signaling pathways based on bioinformatics approach. *Front. Pharmacol.* **2017**.
77. Hong, M.; Zhang, Y.; Li, S.; Tan, H.Y.; Wang, N.; Mu, S.; Hao, X.; Feng, Y. A network pharmacology-based study on the hepatoprotective effect of fructus schisandrae. *Molecules* **2017**.
78. Hong, M.; Li, S.; Wang, N.; Tan, H.Y.; Cheung, F.; Feng, Y. A biomedical investigation of the hepatoprotective effect of radix salviae miltiorrhizae and network pharmacology-based prediction of the active compounds and molecular targets. *Int. J. Mol. Sci.* **2017**.
79. Li, Y.; Wang, J.; Lin, F.; Yang, Y.; Chen, S.S. A methodology for cancer therapeutics by systems pharmacology-based analysis: A case study on breast cancer-related traditional Chinese medicines. *PLoS One* **2017**.
80. Zeng, L.; Yang, K. Exploring the pharmacological mechanism of Yanghe Decoction on HER2-positive breast cancer by a network pharmacology approach. *J. Ethnopharmacol.* **2017**.
81. Huang, J.; Cheung, F.; Tan, H.Y.; Hong, M.; Wang, N.; Yang, J.; Feng, Y.; Zheng, Q. Identification of the active compounds and significant pathways of yinchenhao decoction based on network pharmacology. *Mol. Med. Rep.* **2017**.
82. Huang, J.; Tang, H.; Cao, S.; He, Y.; Feng, Y.; Wang, K.; Zheng, Q. Molecular Targets and Associated Potential Pathways of Danlu Capsules in Hyperplasia of Mammary Glands Based on Systems Pharmacology. *Evidence-Based Complement. Altern. Med.* **2017**.
83. Park, S.Y.; Park, J.H.; Kim, H.S.; Lee, C.Y.; Lee, H.J.; Kang, K.S.; Kim, C.E. Systems-level mechanisms of action of Panax ginseng: a network pharmacological approach. *J. Ginseng Res.* **2018**.
84. Mao, Y.; Hao, J.; Jin, Z.; Niu, Y.; Yang, X.; Liu, D.; Cao, R.; Wu, X. Network pharmacology-based and clinically relevant prediction of the active ingredients and potential targets of Chinese herbs in metastatic breast cancer patients. *Oncotarget* **2017**.
85. Wang, N.; Zheng, Y.; Gu, J.; Cai, Y.; Wang, S.; Zhang, F.; Chen, J.; Situ, H.; Lin, Y.; Wang, Z. Network-pharmacology-based validation of TAMS/CXCL-1 as key mediator of XIAOPI formula preventing breast cancer development and metastasis. *Sci. Rep.* **2017**.
86. Wang, N.; Zhao, G.; Zhang, Y.; Wang, X.; Zhao, L.; Xu, P.; Shou, D. A Network Pharmacology Approach to Determine the Active Components and Potential Targets of Curculigo Orchioides in the Treatment of Osteoporosis. *Med. Sci. Monit.* **2017**.
87. Tan, W.; Wu, T.; Yang, C.; Cai, H.; Fang, S.; Chen, Y.; Wang, Q. Network pharmacology-based study on the mechanism of action for herbal medicines in Alzheimer treatment. *J. Ethnopharmacol.* **2017**.



88. Zeng, L.; Yang, K.; Liu, H.; Zhang, G. A network pharmacology approach to investigate the pharmacological effects of Guizhi Fuling Wan on uterine fibroids. *Exp. Ther. Med.* **2017**.
89. Zhang, Y.; Mao, X.; Su, J.; Geng, Y.; Guo, R.; Tang, S.; Li, J.; Xiao, X.; Xu, H.; Yang, H. A network pharmacology-based strategy deciphers the underlying molecular mechanisms of Qixuehe Capsule in the treatment of menstrual disorders. *Chinese Med. (United Kingdom)* **2017**.
90. Suo, T.; Liu, J.; Chen, X.; Yu, H.; Wang, T.; Li, C.; Wang, Y.; Wang, C.; Li, Z. Combining Chemical Profiling and Network Analysis to Investigate the Pharmacology of Complex Prescriptions in Traditional Chinese Medicine. *Sci. Rep.* **2017**.
91. HU, R.F.; SUN, X.B. Design of new traditional Chinese medicine herbal formulae for treatment of type 2 diabetes mellitus based on network pharmacology. *Chin. J. Nat. Med.* **2017**.
92. Xie, D.; Huang, L.; Zhao, G.; Yu, Y.; Gao, J.; Li, H.; Wen, C. Dissecting the Underlying Pharmaceutical Mechanism of Chinese Traditional Medicine Yun-Pi-Yi-Shen-Tong-Du-Tang Acting on Ankylosing Spondylitis through Systems Biology Approaches. *Sci. Rep.* **2017**.
93. Zhang, Y.Q.; Wang, C.; Guo, Q.Y.; Zhu, C.Y.; Yan, C.; Sun, D.N.; Xu, Q.H.; Lin, N. Molecular mechanisms of the analgesic action of Wu-tou Decoction on neuropathic pain in mice revealed using microarray and network analysis. *Acta Pharmacol. Sin.* **2018**.
94. Lyu, M.; Yan, C.L.; Liu, H.X.; Wang, T.Y.; Shi, X.H.; Liu, J.P.; Orgah, J.; Fan, G.W.; Han, J.H.; Wang, X.Y.; et al. Network pharmacology exploration reveals endothelial inflammation as a common mechanism for stroke and coronary artery disease treatment of Danhong injection. *Sci. Rep.* **2017**.
95. Wang, J.; Liu, R.; Liu, B.; Yang, Y.; Xie, J.; Zhu, N. Systems Pharmacology-based strategy to screen new adjuvant for hepatitis B vaccine from Traditional Chinese Medicine *Ophiocordyceps sinensis*. *Sci. Rep.* **2017**.
96. Li, H.; Liu, L.; Liu, C.; Zhuang, J.; Zhou, C.; Yang, J.; Gao, C.; Liu, G.; Lv, Q.; Sun, C. Deciphering Key Pharmacological Pathways of Qingdai Acting on Chronic Myeloid Leukemia Using a Network Pharmacology-Based Strategy. *Med. Sci. Monit.* **2018**.
97. Zhong, Y.; Luo, J.; Tang, T.; Li, P.; Liu, T.; Cui, H.; Wang, Y.; Huang, Z. Exploring Pharmacological Mechanisms of Xuefu Zhuyu Decoction in the Treatment of Traumatic Brain Injury via a Network Pharmacology Approach. *Evidence-Based Complement. Altern. Med.* **2018**.
98. Li, J.; Ma, X.; Liu, C.; Li, H.; Zhuang, J.; Gao, C.; Zhou, C.; Liu, L.; Wang, K.; Sun, C. Exploring the Mechanism of Danshen against Myelofibrosis by Network Pharmacology and Molecular Docking. *Evidence-Based Complement. Altern. Med.* **2018**.
99. Pang, H.Q.; Yue, S.J.; Tang, Y.P.; Chen, Y.Y.; Tan, Y.J.; Cao, Y.J.; Shi, X.Q.; Zhou, G.S.; Kang, A.; Huang, S.L.; et al. Integrated metabolomics and network pharmacology approach to explain possible action mechanisms of Xin-Sheng-Hua granule for treating anemia. *Front. Pharmacol.* **2018**.
100. Bing, Z.; Cheng, Z.; Shi, D.; Liu, X.; Tian, J.; Yao, X.; Zhang, J.; Wang, Y.; Yang, K. Investigate the mechanisms of Chinese medicine Fuzhengkangai towards EGFR mutation-positive lung adenocarcinomas by network pharmacology. *BMC Complement. Altern. Med.* **2018**.

101. Zhao, M.; Chen, Y.; Wang, C.; Xiao, W.; Chen, S.; Zhang, S.; Yang, L.; Li, Y. Systems pharmacology dissection of multi-scale mechanisms of action of Huo-Xiang-Zheng-qi formula for the treatment of gastrointestinal diseases. *Front. Pharmacol.* **2019**.
102. Dai, W.; Chen, H.-Y.; Chen, C.Y.-C. A Network Pharmacology-Based Approach to Investigate the Novel TCM Formula against Huntington's Disease and Validated by Support Vector Machine Model. *Evidence-Based Complement. Altern. Med.* **2018**.
103. Zhou, C.; Liu, L.; Zhuang, J.; Wei, J.; Zhang, T.; Gao, C.; Liu, C.; Li, H.; Si, H.; Sun, C. A Systems Biology-Based Approach to Uncovering Molecular Mechanisms Underlying Effects of Traditional Chinese Medicine Qingdai in Chronic Myelogenous Leukemia, Involving Integration of Network Pharmacology and Molecular Docking Technology. *Med. Sci. Monit.* **2018**.
104. Wang, J.B.; Cui, H.R.; Wang, R.L.; Zhang, C.E.; Niu, M.; Bai, Z.F.; Xu, G.H.; Li, P.Y.; Jiang, W.Y.; Han, J.J.; et al. A systems pharmacology-oriented discovery of a new therapeutic use of the TCM formula Liuweiwuling for liver failure. *Sci. Rep.* **2018**.
105. Chen, L.; Cao, Y.; Zhang, H.; Lv, D.; Zhao, Y.; Liu, Y.; Ye, G.; Chai, Y. Network pharmacology-based strategy for predicting active ingredients and potential targets of Yangxinshi tablet for treating heart failure. *J. Ethnopharmacol.* **2018**.
106. Gómez-Verjan, J.C.; Rivero-Segura, N.A.; Estrella-Parra, E.; Rincón-Heredia, R.; Madariaga-Mazón, A.; Flores-Soto, E.; González-Meljem, M.; Cerbón, M.; Reyes-Chilpa, R. Network Pharmacology Uncovers Anticancer Activity of Mammea-Type Coumarins from *Calophyllum brasiliense*. *Planta Med.* **2019**.
107. Park, M.; Park, S.-Y.; Lee, H.-J.; Kim, C.-E. A Systems-Level Analysis of Mechanisms of *Platycodon grandiflorum* Based on A Network Pharmacological Approach. *Molecules* **2018**.
108. Lee, A.Y.; Park, W.; Kang, T.W.; Cha, M.H.; Chun, J.M. Network pharmacology-based prediction of active compounds and molecular targets in Yijin-Tang acting on hyperlipidaemia and atherosclerosis. *J. Ethnopharmacol.* **2018**.
109. Lee, D.; Kim, C.E.; Park, S.Y.; Kim, K.O.; Hiep, N.T.; Lee, D.; Jang, H.J.; Lee, J.W.; Kang, K.S. Protective effect of artemisia argyi and its flavonoid constituents against contrast-induced cytotoxicity by iodixanol in LLC-PK1 cells. *Int. J. Mol. Sci.* **2018**.
110. Gong, B.; Kao, Y.; Zhang, C.; Sun, F.; Zhao, H. Systematic Investigation of *Scutellariae Barbatae Herba* for Treating Hepatocellular Carcinoma Based on Network Pharmacology. *Evidence-Based Complement. Altern. Med.* **2018**.
111. Xu, T.; Ma, C.; Fan, S.; Deng, N.; Lian, Y.; Tan, L.; Du, W.; Zhang, S.; Liu, S.; Ren, B.; et al. Systematic Understanding of the Mechanism of Baicalin against Ischemic Stroke through a Network Pharmacology Approach. *Evidence-Based Complement. Altern. Med.* **2018**.
112. Liu, J.; Liu, J.; Shen, F.; Qin, Z.; Jiang, M.; Zhu, J.; Wang, Z.; Zhou, J.; Fu, Y.; Chen, X.; et al. Systems pharmacology analysis of synergy of TCM: An example using saffron formula. *Sci. Rep.* **2018**.

113. Zhang, W.; Huai, Y.; Miao, Z.; Chen, C.; Shahen, M.; Rahman, S.U.; Alagawany, M.; El-Hack, M.E.A.; Zhao, H.; Qian, A. Systems pharmacology approach to investigate the molecular mechanisms of herb *Rhodiola rosea* L. radix. *Drug Dev. Ind. Pharm.* **2019**.
114. Dai, X. min; Cui, D. ni; Wang, J.; Zhang, W.; Zhang, Z. jian; Xu, F. guo Systems pharmacology based strategy for Q-markers discovery of HuangQin decoction to attenuate intestinal damage. *Front. Pharmacol.* **2018**.
115. Lan, T.-H.; Zhang, L.-L.; Wang, Y.-H.; Wu, H.-L.; Xu, D.-P. Systems Pharmacology Dissection of Traditional Chinese Medicine Wen-Dan Decoction for Treatment of Cardiovascular Diseases. *Evidence-Based Complement. Altern. Med.* **2018**.
116. Su, X.; Li, Y.; Jiang, M.; Zhu, J.; Zheng, C.; Chen, X.; Zhou, J.; Li, Y.; Xiao, W.; Wang, Y. Systems pharmacology uncover the mechanism of anti-non-small cell lung cancer for *Hedyotis diffusa* Willd. *Biomed. Pharmacother.* **2019**.
117. Zheng, Y.; Wang, M.; Zheng, P.; Tang, X.; Ji, G. Systems pharmacology-based exploration reveals mechanisms of anti-steatotic effects of Jiang Zhi Granule on non-alcoholic fatty liver disease. *Sci. Rep.* **2018**.
118. Zhu, H.; Hao, J.; Niu, Y.; Liu, D.; Chen, D.; Wu, X. Molecular targets of Chinese herbs: A clinical study of metastatic colorectal cancer based on network pharmacology. *Sci. Rep.* **2018**.
119. LIU, F.; DU, X.; LIU, P.R.; SUN, Y.H.; ZHANG, Y.M. Screening and analysis of key active constituents in Guanxinshutong capsule using mass spectrum and integrative network pharmacology. *Chin. J. Nat. Med.* **2018**.
120. Chen, Y.; Sun, Y.; Li, W.; Wei, H.; Long, T.; Li, H.; Xu, Q.; Liu, W. Systems pharmacology dissection of the anti-stroke mechanism for the Chinese traditional medicine Xing-Nao-Jing. *J. Pharmacol. Sci.* **2018**.
121. Wang, T.; Wu, Z.; Sun, L.; Li, W.; Liu, G.; Tang, Y. A computational systems pharmacology approach to investigate molecular mechanisms of herbal formula Tian-Ma-Gou-Teng-Yin for treatment of Alzheimer's disease. *Front. Pharmacol.* **2018**.
122. Xie, G.; Peng, W.; Li, P.; Xia, Z.; Zhong, Y.; He, F.; Tulake, Y.; Feng, D.; Wang, Y.; Xing, Z. A Network Pharmacology Analysis to Explore the Effect of Astragali Radix-Radix Angelica Sinensis on Traumatic Brain Injury. *Biomed Res. Int.* **2018**.
123. Liu, L.; Du, B.; Zhang, H.; Guo, X.; Zhou, Z.; Xiu, A.; Liu, C.; Su, S.; Ai, H. A network pharmacology approach to explore the mechanisms of Erxian decoction in polycystic ovary syndrome. *Chinese Med. (United Kingdom)* **2018**.
124. Dai, Y.; Sun, L.; Qiang, W. A New Strategy to Uncover the Anticancer Mechanism of Chinese Compound Formula by Integrating Systems Pharmacology and Bioinformatics. *Evidence-Based Complement. Altern. Med.* **2018**.
125. Zuo, J.; Wang, X.; Liu, Y.; Ye, J.; Liu, Q.; Li, Y.; Li, S. Integrating Network Pharmacology and Metabolomics Study on Anti-rheumatic Mechanisms and Antagonistic Effects Against Methotrexate-Induced Toxicity of Qing-Luo-Yin. *Front. Pharmacol.* **2018**.

126. Yao, H.; Huang, X.; Xie, Y.; Huang, X.; Ruan, Y.; Lin, X.; Huang, L.; Shi, P. Identification of Pharmacokinetic Markers for Guanxin Danshen Drop Pills in Rats by Combination of Pharmacokinetics, Systems Pharmacology, and Pharmacodynamic Assays. *Front. Pharmacol.* **2018**.
127. Zhao, S.; Liu, Z.; Wang, M.; He, D.; Liu, L.; Shu, Y.; Song, Z.; Li, H.; Liu, Y.; Lu, A. Anti-inflammatory effects of Zhishi and Zhiqiao revealed by network pharmacology integrated with molecular mechanism and metabolomics studies. *Phytomedicine* **2018**.
128. Li, Y. yan; Zheng, G.; Liu, L. Bioinformatics Based Therapeutic Effects of Sinomenium Acutum. *Chin. J. Integr. Med.* **2019**.
129. Zhang, J.; Liang, R.; Wang, L.; Yang, B. Effects and mechanisms of Danshen-Shanzha herb-pair for atherosclerosis treatment using network pharmacology and experimental pharmacology. *J. Ethnopharmacol.* **2019**.
130. Gao, K.; Yang, R.; Zhang, J.; Wang, Z.; Jia, C.; Zhang, F.; Li, S.; Wang, J.; Murtaza, G.; Xie, H.; et al. Effects of Qijian mixture on type 2 diabetes assessed by metabonomics, gut microbiota and network pharmacology. *Pharmacol. Res.* **2018**.
131. Li, Y.; Li, Y.; Lu, W.; Li, H.; Wang, Y.; Luo, H.; Wu, Y.; Dong, W.; Bai, G.; Zhang, Y. Integrated network pharmacology and metabolomics analysis of the therapeutic effects of Zi Dian Fang on immune thrombocytopenic purpura. *Front. Pharmacol.* **2018**.
132. Zhao, P.; Li, J.; Yang, L.; Li, Y.; Tian, Y.; Li, S. Integration of transcriptomics, proteomics, metabolomics and systems pharmacology data to reveal the therapeutic mechanism underlying Chinese herbal Bufeif Yishen formula for the treatment of chronic obstructive pulmonary disease. *Mol. Med. Rep.* **2018**.
133. Dawood, M.; Hamdoun, S.; Efferth, T. Multifactorial modes of action of arsenic trioxide in cancer cells as analyzed by classical and network pharmacology. *Front. Pharmacol.* **2018**.
134. Liao, J.; Hao, C.; Huang, W.; Shao, X.; Song, Y.; Liu, L.; Ai, N.; Fan, X. Network pharmacology study reveals energy metabolism and apoptosis pathways-mediated cardioprotective effects of Shenqi Fuzheng. *J. Ethnopharmacol.* **2018**.
135. Zheng, J.; Wu, M.; Wang, H.; Li, S.; Wang, X.; Li, Y.; Wang, D.; Li, S. Network Pharmacology to Unveil the Biological Basis of Health-Strengthening Herbal Medicine in Cancer Treatment. *Cancers (Basel)*. **2018**.
136. Xue, J.; Shi, Y.; Li, C.; Song, H. Network pharmacology-based prediction of the active ingredients, potential targets, and signaling pathways in compound Lian-Ge granules for treatment of diabetes. *J. Cell. Biochem.* **2019**.
137. Yu, G.; Wang, W.; Wang, X.; Xu, M.; Zhang, L.; Ding, L.; Guo, R.; Shi, Y. Network pharmacology-based strategy to investigate pharmacological mechanisms of Zuojinwan for treatment of gastritis. *BMC Complement. Altern. Med.* **2018**.
138. Wang, N.; Yang, B.; Zhang, X.; Wang, S.; Zheng, Y.; Li, X.; Liu, S.; Pan, H.; Li, Y.; Huang, Z.; et al. Network pharmacology-based validation of caveolin-1 as a key mediator of Ai du Qing inhibition of drug resistance in breast cancer. *Front. Pharmacol.* **2018**.

139. Chen, Y.L.; Zhang, Y.L.; Dai, Y.C.; Tang, Z.P. Systems pharmacology approach reveals the antiinflammatory effects of *Ampelopsis grossedentata* on dextran sodium sulfate-induced colitis. *World J. Gastroenterol.* **2018**.
140. Kim, J.; Yoo, M.; Shin, J.; Kim, H.; Kang, J.; Tan, A.C. Systems Pharmacology-Based Approach of Connecting Disease Genes in Genome-Wide Association Studies with Traditional Chinese Medicine. *Int. J. Genomics* **2018**, *2018*, 1–11.
141. LUO, Y.X.; WANG, X.Y.; HUANG, Y.J.; FANG, S.H.; WU, J.; ZHANG, Y. Bin; XIONG, T.Q.; YANG, C.; SHEN, J.G.; SANG, C.L.; et al. Systems pharmacology-based investigation of Sanwei Ganjiang Prescription: related mechanisms in liver injury. *Chin. J. Nat. Med.* **2018**.
142. Gao, L.; Wang, K.X.; Zhou, Y.Z.; Fang, J.S.; Qin, X.M.; Du, G.H. Uncovering the anticancer mechanism of Compound Kushen Injection against HCC by integrating quantitative analysis, network analysis and experimental validation. *Sci. Rep.* **2018**.
143. Xiong, Y.; Hu, Y.; Chen, L.; Zhang, Z.; Zhang, Y.; Niu, M.; Cui, X. Unveiling Active Constituents and Potential Targets Related to the Hematinic Effect of Steamed *Panax notoginseng* Using Network Pharmacology Coupled With Multivariate Data Analyses. *Front. Pharmacol.* **2019**.
144. Li, C.; Zhang, W.Y.; Yu, Y.; Cheng, C.S.; Han, J.Y.; Yao, X.S.; Zhou, H. Discovery of the mechanisms and major bioactive compounds responsible for the protective effects of Gualou Xiebai Decoction on coronary heart disease by network pharmacology analysis. *Phytomedicine* **2019**.
145. Liu, Z.; Du, J.; Yan, X.; Zhong, J.; Cui, L.; Lin, J.; Zeng, L.; Ding, P.; Chen, P.; Zhou, X.; et al. TCMAalyzer: A Chemo- and Bioinformatics Web Service for Analyzing Traditional Chinese Medicine. *J. Chem. Inf. Model.* **2018**.
146. Huang, T.; Ning, Z.; Hu, D.; Zhang, M.; Zhao, L.; Lin, C.; Zhong, L.L.D.; Yang, Z.; Xu, H.; Bian, Z. Uncovering the mechanisms of Chinese herbal medicine (MaZiRenWan) for functional constipation by focused network pharmacology approach. *Front. Pharmacol.* **2018**.
147. Niu, X.; Zhang, J.; Ni, J.; Wang, R.; Zhang, W.; Sun, S.; Peng, Y.; Bai, M.; Zhang, Z. Network pharmacology-based identification of major component of *Angelica sinensis* and its action mechanism for the treatment of acute myocardial infarction. *Biosci. Rep.* **2018**.
